# Supplementary material for: Close-packing effect of water clusters within metal–organic framework pores on proton conductivity: a dielectric relaxation phenomenon in loose space and colossal dielectric permittivity
Source: Royal Society of Chemistry journal article supplement (doi:10.1039/d4dt01945h), 2024-01-01
Supplement: d4dt01945h1.pdf [file d4dt01945h1.pdf]

**Electronic supplementary information for the paper:**

**Close-packing effect of water clusters within metal–organic  
framework pores on proton conductivity: a dielectric relaxation  
phenomenon in loose space and colossal dielectric permittivity**

Bingtang Chen,<sup>a</sup> Fengxia Xie,<sup>\*a</sup> Xiaoqiang Liang,<sup>\*a</sup> Chengan Wan,<sup>b</sup> Feng Zhang, Lei  
Feng,<sup>b</sup> Qianmeng Lai,<sup>a</sup> Ziyang Wang,<sup>a</sup> and Chen Wen<sup>\*b</sup>

<sup>a</sup> *College of Environmental and Chemical Engineering, Xi'an Polytechnic University, Xi'an 710048, PR China. E-mail: anxiny@163.com, xq-liang@163.com*

<sup>b</sup> *Beijing Spacecrafts Manufacturing Factory, Beijing 100094, PR China. E-mail: 13552907280@163.com*

<sup>c</sup> *Key Laboratory of Photochemical Biomaterials and Energy Storage Materials, Heilongjiang Province and College of Chemistry and Chemical Engineering, Harbin Normal University, Harbin 150025, PR China.*

## Table of Contents

| Section | Content                                                   | Page    |
|---------|-----------------------------------------------------------|---------|
| I       | Crystal data and structures                               | S3–S7   |
| II      | Characterization: PXRD patterns                           | S8      |
| III     | Characterization: IR spectra                              | S9      |
| IV      | Characterization: Purity                                  | S10–S11 |
| V       | Characterization: SEM images                              | S12     |
| VI      | Characterization: Flexibility                             | S13–S14 |
| VII     | Stability: TGA curves                                     | S15     |
| VIII    | Hydrophilicity: water adsorption and water contact angle  | S16     |
| IX      | Electrochemical measurements: impedance spectra           | S17–S22 |
| X       | PXRD patterns after impedance measurements                | S23     |
| XI      | DC conductivity and activation energy                     | S24     |
| XII     | Differential scanning calorimeter measurements            | S25     |
| XIII    | Dielectric spectrum                                       | S26     |
| XIV     | Comparison of chemical stability                          | S27     |
| XV      | Comparison of proton conductivity                         | S28–S29 |
| XVI     | Fitting of Cole-Cole plots                                | S30     |
| XVII    | Comparison of dielectric constant                         | S31     |
| XVIII   | Comparison of dielectric constant and proton conductivity | S32     |
| XIX     | References for electronic supplementary information       | S33–S37 |

## I. Crystallographic data and structures

Table S1 Crystallographic data and details of refinements for **Sm-fum-7H<sub>2</sub>O** and **Er-fum-12H<sub>2</sub>O**<sup>1,2</sup>

| Compounds                                                                                                 | Sm-fum-7H <sub>2</sub> O                                        | Er-fum-12H <sub>2</sub> O                         |
|-----------------------------------------------------------------------------------------------------------|-----------------------------------------------------------------|---------------------------------------------------|
| Empirical formula                                                                                         | C <sub>12</sub> H <sub>16</sub> O <sub>19</sub> Sm <sub>2</sub> | C <sub>6</sub> H <sub>15</sub> O <sub>12</sub> Er |
| <i>Mr</i>                                                                                                 | 764.97                                                          | 446.44                                            |
| Crystal system                                                                                            | Monoclinic                                                      | Monoclinic                                        |
| Space group                                                                                               | <i>P2<sub>1</sub>/n</i>                                         | <i>P2<sub>1</sub>/c</i>                           |
| <i>a</i> (Å)                                                                                              | 9.5178(2)                                                       | 8.457(1)                                          |
| <i>b</i> (Å)                                                                                              | 14.6999(3)                                                      | 17.225(1)                                         |
| <i>c</i> (Å)                                                                                              | 14.8740(3)                                                      | 9.690(1)                                          |
| $\alpha$ (°)                                                                                              | 90                                                              | 90                                                |
| $\beta$ (°)                                                                                               | 91.2425(9)                                                      | 112.22(1)                                         |
| $\gamma$ (°)                                                                                              | 90                                                              | 90                                                |
| <i>V</i> (Å <sup>3</sup> )                                                                                | 2080.54(7)                                                      | 1306.7(2)                                         |
| <i>Z</i>                                                                                                  | 4                                                               | 4                                                 |
| <i>D<sub>c</sub></i> (g cm <sup>-3</sup> )                                                                | 2.442                                                           | 2.269                                             |
| $\mu$ (mm <sup>-1</sup> )                                                                                 | 5.684                                                           | 6.480                                             |
| <i>F</i> (000)                                                                                            | 1456                                                            | 860                                               |
| $\theta$ range [°]                                                                                        | 3.5– 27.5                                                       | 2.4– 25.0                                         |
| Collected reflections                                                                                     | 36935                                                           | 2619                                              |
| Unique reflections                                                                                        | 4765                                                            | 2289                                              |
| Parameters                                                                                                | 330                                                             | 182                                               |
| <i>T</i> (K)                                                                                              | 180                                                             | 293                                               |
| <i>R</i> <sub>1</sub> <sup>[a]</sup> , <i>wR</i> <sub>2</sub> <sup>[b]</sup> [ <i>I</i> > 2σ( <i>I</i> )] | 0.0284, 0.0568                                                  | 0.0314, 0.1159                                    |
| GOF                                                                                                       | 0.93                                                            | 1.18                                              |
| Largest peak and hole (e · Å <sup>-3</sup> )                                                              | -1.22, 1.28                                                     | -1.47, 0.94                                       |

<sup>[a]</sup>  $R_1 = \sum ||F_o| - |F_c|| / \sum |F_o|$ . <sup>[b]</sup>  $wR_2 = [\sum w(|F_o|^2 - |F_c|^2)^2 / \sum w(|F_o|^2)^2]^{1/2}$

Table S2 Coordination Bond Lengths (Å) for **Sm-fum-7H<sub>2</sub>O** and **Er-fum-12H<sub>2</sub>O**.

| <b>Sm-fum-7H<sub>2</sub>O</b> |          |              |          |
|-------------------------------|----------|--------------|----------|
| Sm(1)–O(1)                    | 2.628(3) | Sm(2)–O(1)   | 2.472(3) |
| Sm(1)–O(2)                    | 2.509(3) | Sm(2)–O(5)   | 2.623(3) |
| Sm(1)–O(5)                    | 2.416(3) | Sm(2)–O(6)   | 2.498(3) |
| Sm(1)–O(9)                    | 2.352(3) | Sm(2)–O(10)  | 2.467(3) |
| Sm(1)–O(13)                   | 2.449(3) | Sm(2)–O(15)  | 2.430(3) |
| Sm(1)–O(14)                   | 2.407(3) | Sm(2)–O(16)  | 2.469(3) |
| Sm(1)–O(3a)                   | 2.555(3) | Sm(2)–O(8c)  | 2.371(3) |
| Sm(1)–O(4a)                   | 2.469(3) | Sm(2)–O(11d) | 2.543(3) |
| Sm(1)–O(7b)                   | 2.451(3) | Sm(2)–O(12d) | 2.471(3) |
| <b>Er-fum-H<sub>2</sub>O</b>  |          |              |          |
| Er(1)–O(1)                    | 2.200(7) | Er(1)–O(5W)  | 2.431(7) |
| Er(1)–O(2)                    | 2.341(6) | Er(1)–O(6)   | 2.392(6) |
| Er(1)–O(4)                    | 2.320(7) | Er(1)–O(6W)  | 2.400(7) |
| Er(1)–O(5)                    | 2.462(5) | Er(1)–O(3a)  | 2.254(6) |

Symmetry codes: a) 1+x, y, z; b) 1/2+x, 1/2–y, 1/2+z; a) 1+x, y, z; b) –x, –y, 2–z for **Sm-fum-7H<sub>2</sub>O**; a) x, 3/2–y, 1/2+z for **Er-fum-H<sub>2</sub>O**.

Table S3 Hydrogen-bonding geometry parameters ( $\text{\AA}$ ,  $^\circ$ ) for **Sm-fum-7H<sub>2</sub>O** and **Er-fum-12H<sub>2</sub>O**

| <b>D-H...A</b>                 | <b>d(D-H)</b> | <b>d(H...A)</b> | <b>d(D...A)</b> | <b><math>\angle</math>(DHA)</b> |
|--------------------------------|---------------|-----------------|-----------------|---------------------------------|
| <b>Sm-fum-7H<sub>2</sub>O</b>  |               |                 |                 |                                 |
| O(13) – H(131)···O(12)         | 0.93(4)       | 1.89(4)         | 2.781(4)        | 159(4)                          |
| O(13)–H(132)···O(1)            | 0.95(4)       | 2.49(5)         | 2.808(4)        | 100(4)                          |
| O(13) –H(132)···O(17)          | 0.95(4)       | 1.94(4)         | 2.883(5)        | 174(4)                          |
| O(14) –H(141)···O(2)           | 0.93(5)       | 1.80(4)         | 2.734(4)        | 176(4)                          |
| O(14) –H(142)···O(6)           | 0.95(4)       | 1.82(4)         | 2.766(4)        | 172(4)                          |
| O(15) –H(151)···O(3)           | 0.97(3)       | 1.78(4)         | 2.739(4)        | 169(5)                          |
| O(15) – H(152)···O(17)         | 0.97(3)       | 1.84(3)         | 2.794(5)        | 167(5)                          |
| O(16) –H(161)···O(7)           | 0.93(4)       | 1.80(4)         | 2.694(4)        | 159(5)                          |
| O(16) – H(162)···O(4)          | 0.90(3)       | 2.02(3)         | 2.910(4)        | 170(5)                          |
| O(17) –H(171)···O(11)          | 0.95(4)       | 1.94(4)         | 2.887(5)        | 172(5)                          |
| O(17) –H(172)···O(18)          | 0.90(5)       | 2.19(5)         | 2.934(8)        | 139(4)                          |
| O(17) –H1(72)···O(19)          | 0.90(5)       | 2.00(5)         | 2.735(9)        | 138(4)                          |
| O(18)···O(19)                  | -             | -               | 2.66            | -                               |
| <b>Er-fum-12H<sub>2</sub>O</b> |               |                 |                 |                                 |
| O(3W) –H(3WA)···O(6W)          | 1.0900        | 2.2000          | 3.058(12)       | 134.00                          |
| O(6W) –H(6WA)···O(1W)          | 0.8300        | 2.0200          | 2.766(10)       | 150.00                          |
| O(2W)–H(2WA)···O(1)            | 0.8300        | 2.5800          | 3.169(5)        | 129.00                          |
| O(3W)–H(3WB)···O(4WA)          | 1.1300        | 2.4600          | 3.035(14)       | 110.00                          |
| O(2W) –H(2WA)···O(2)           | 0.714(19)     | 2.48(9)         | 3.070(11)       | 142(11)                         |
| O(6W) –H(6WB)···O(4WA)         | 0.8700        | 2.5900          | 3.291(12)       | 138.00                          |
| O(6W) –H(6WB)···O(3W)          | 0.8700        | 2.3900          | 3.058(12)       | 134.00                          |
| O(4WA)–H(4WB)···O(1W)          | 0.9200        | 2.1000          | 2.940(12)       | 152.00                          |
| O(2W) –H(2WB)···O(3W)          | 1.1100        | 2.1400          | 2.843(13)       | 119.00                          |
| O(1W) –H(1WB)··· O(4)          | 1.1400        | 2.3700          | 3.149(10)       | 124.00                          |
| O(1W) –H(1WB)···O(6)           | 1.1400        | 2.4300          | 3.261(9)        | 128.00                          |
| O(5W)–H(5WB)···O(4WA)          | 0.9600        | 2.0300          | 2.902(13)       | 151.00                          |

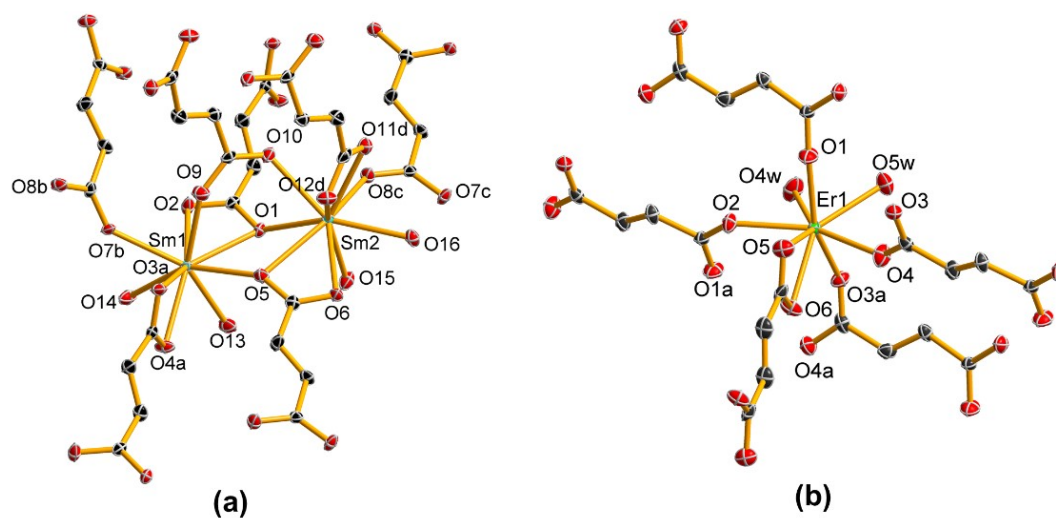

**Fig. S1** (a) Coordination environment of Sm(III) in **Sm-fum-7H<sub>2</sub>O**. Symmetry codes: a)  $1+x, y, z$ ; b)  $1/2+x, 1/2-y, 1/2+z$ ; c)  $1+x, y, z$ ; d)  $-x, -y, 2-z$ . (b) Coordination environment of Er(III) in **Er-fum-12H<sub>2</sub>O**. Symmetry codes: a)  $x, 3/2-y, 1/2+z$ . Thermal ellipsoids are drawn at the 50% probability level. Hydrogen atoms have been omitted for clarity. (Colour code: black, C; red, O; cyan, Sm; green, Er).

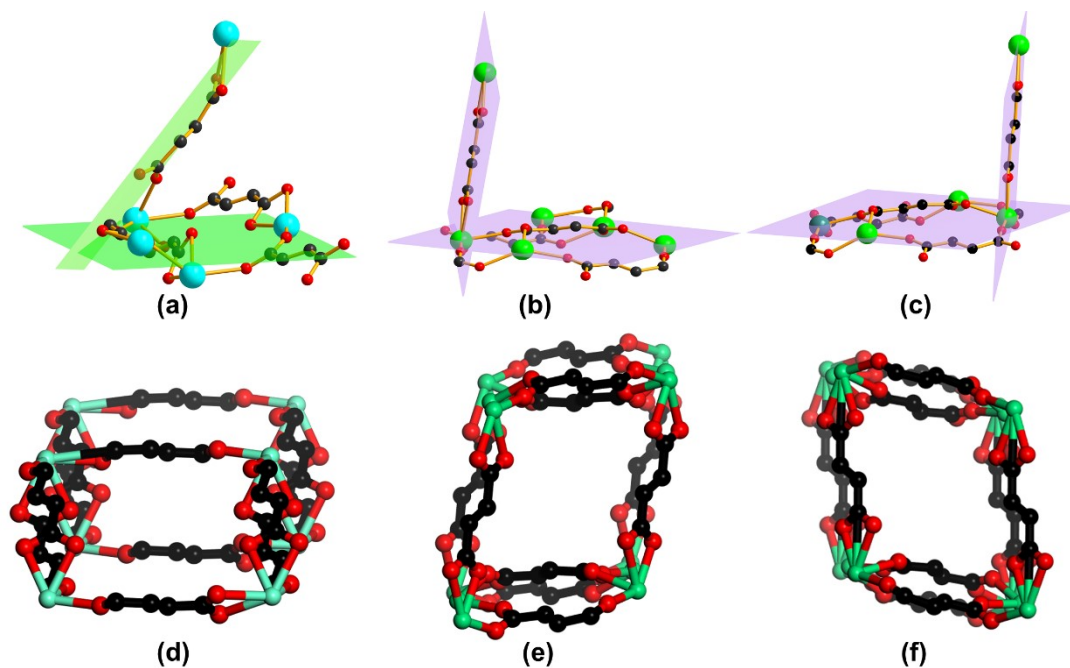

**Fig. S2** Dihedral angles between the mean planes of the pillared fumarate ligands and the 2D layers formed by the fumarate ligands and lanthanide ions for **Sm-fum-7H<sub>2</sub>O** (a), **Er-fum-12H<sub>2</sub>O** (b) and **Er-fum-12H<sub>2</sub>O** (c). The cavities or channels in **Sm-fum-7H<sub>2</sub>O** (d), **Er-fum-12H<sub>2</sub>O** (e) and **Er-fum-12H<sub>2</sub>O** (f). Hydrogen atoms have been omitted for clarity. (Colour code: black, C; red, O; cyan, Sm; green, Er).

## II. Characterization: PXRD patterns

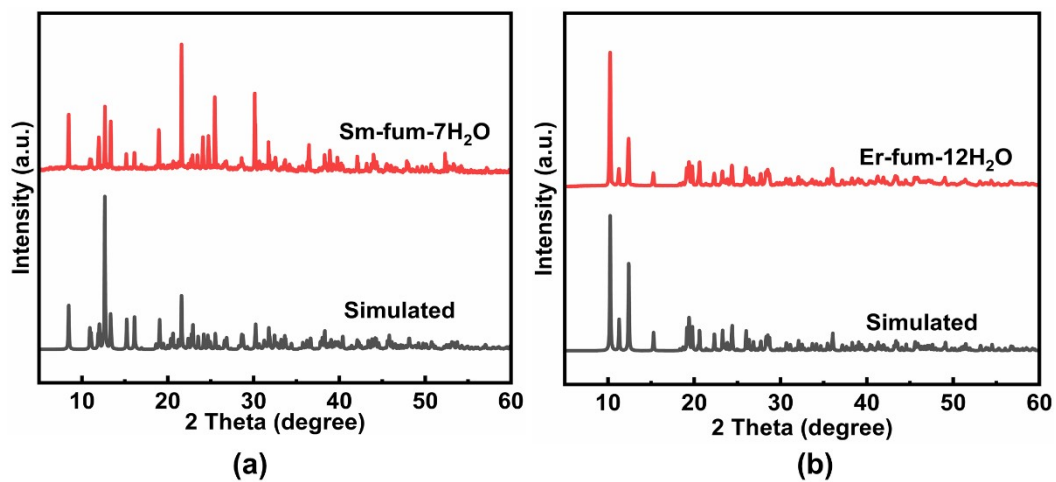

**Fig. S3** The PXRD patterns for **Sm-fum-7H<sub>2</sub>O** (a) and **Er-fum-12H<sub>2</sub>O** (b) of a simulation based on single crystal data of reported and as-synthesized bulk crystals.



### III. Characterization: IR spectra

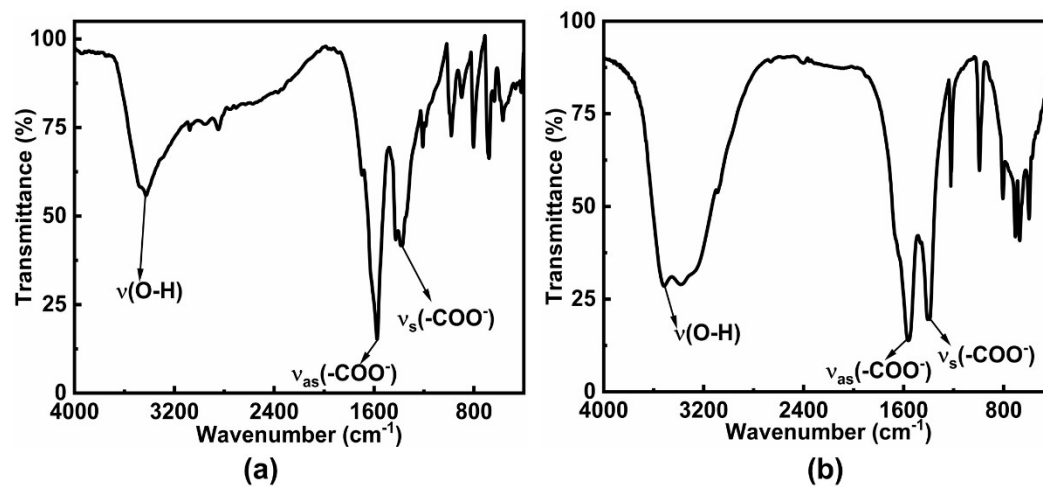

Fig. S4 IR absorption spectra of **Sm-fum-7H<sub>2</sub>O** (a) and **Er-fum-12H<sub>2</sub>O** (b).

## IV. Characterization: Purity

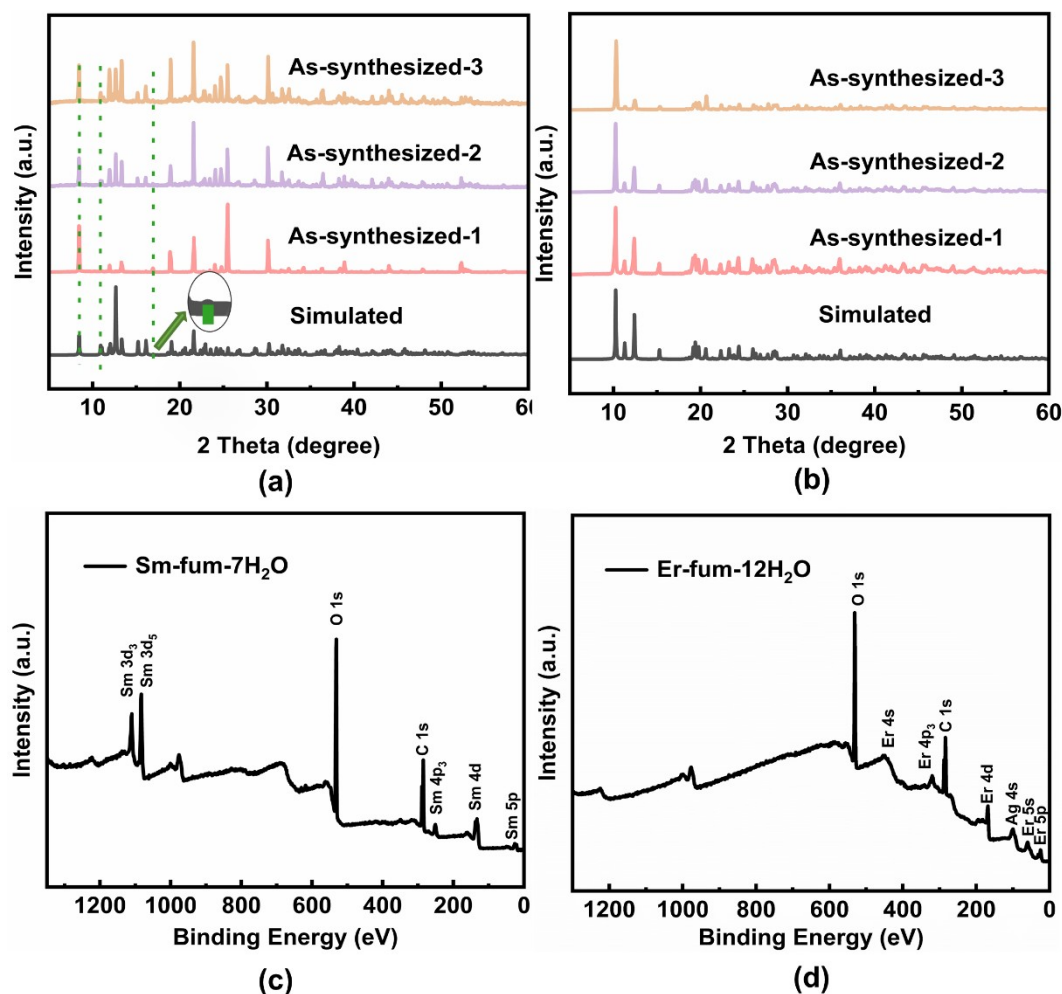

**Fig. S5** The PXRD patterns for **Sm-fum-7H<sub>2</sub>O** (a) and **Er-fum-12H<sub>2</sub>O** (b) of a simulation based on single crystal data of reported and three as-synthesized bulk samples. The XPS survey spectra for **Sm-fum-7H<sub>2</sub>O** (c) and **Er-fum-12H<sub>2</sub>O** (d).

The influence of impurities or defects on the proton conductivity of MOFs is well-documented in the literature. For example, in 2015, S. Kitagawa's study demonstrated that manipulating ligand defects within UiO-66 could enhance proton conductivity by nearly three orders of magnitude, achieving a remarkable  $6.93 \times 10^{-3} \text{ S} \cdot \text{cm}^{-1}$  at 65 °C and 95% RH.<sup>3</sup> This finding emphasizes the potential of deliberately introducing ligand defects to control proton mobility and improve the proton-conducting properties of MOFs. Further research by H. Hou and his team in 2021 revealed that ligand exchange, which introduced pore defects within MOF crystals, significantly enhanced proton transfer. Their findings indicated that the proton conductivity of MOF-bpy reached  $1.27 \times 10^{-3} \text{ S} \cdot \text{cm}^{-1}$ , which is 3.5 times greater than that of MOF-azo, while MOF-bpe

exhibited a proton conductivity of  $1.01 \times 10^{-3} \text{ S} \cdot \text{cm}^{-1}$ , 2.8 times higher than MOF-azo.<sup>4</sup>

In addition to proton conductivity, impurities or defects also significantly affect dielectric properties. Research by N. F. Shi demonstrated that defects in the  $\text{Co}_3\text{O}_4/\text{N-C}$  structure led to lower dielectric loss values relative to the defect-free  $\text{Co}_3\text{O}_4/\text{C}$ , suggesting that the presence of defects can enhance dielectric performance.<sup>5</sup> Similarly, H. Xu's investigation into defects in MOF materials found that the removal of small molecules induced defects and functional groups that facilitated energy transfer from adjacent states to the Fermi level, promoting Debye dipole relaxation and resulting in high-performance microwave absorbers with improved dielectric properties.<sup>6</sup>

In light of these findings, we conducted an investigation into the impurities or defects present in Sm-fum-7H<sub>2</sub>O and Er-fum-12H<sub>2</sub>O. To confirm the phase purity of the synthesized samples, PXRD measurements were performed three times prior to impedance testing. As shown in Fig. S5a and b, the PXRD peak positions of the synthesized samples closely matched with the simulated data obtained from single crystal analysis, confirming the absence of experimental randomness and establishing that both Sm-fum-7H<sub>2</sub>O and Er-fum-12H<sub>2</sub>O are of pure phase. Additionally, XPS was employed to assess the elemental composition of Sm-fum-7H<sub>2</sub>O and Er-fum-12H<sub>2</sub>O. The survey spectra, depicted in Fig. S5c and d, revealed the presence of only C, O, and Sm elements in Sm-fum-7H<sub>2</sub>O, while Er-fum-12H<sub>2</sub>O contained C, O, and Er, with the exception of a trace amount of Ag, by utilizing Advantage software for peak identification. It should be noted that the presence of the Ag element in the XPS measurement may be attributed to the adhered silver conductive colloid in the Er-fum-12H<sub>2</sub>O sample under experimental conditions. The surface of the Er-fum-12H<sub>2</sub>O sample is more susceptible to contact with the silver conductive colloid due to its smaller size compared to the Sm-fum-7H<sub>2</sub>O sample. The combined analysis of the PXRD patterns and XPS survey spectra provides strong evidence that both Sm-fum-7H<sub>2</sub>O and Er-fum-12H<sub>2</sub>O are of pure phases, indicating the absence of impurities in these samples. Consequently, the properties subsequently tested accurately reflect the intrinsic characteristics of pure-phase single crystals, remaining uninfluenced by impurities.

## V. Characterization: SEM images

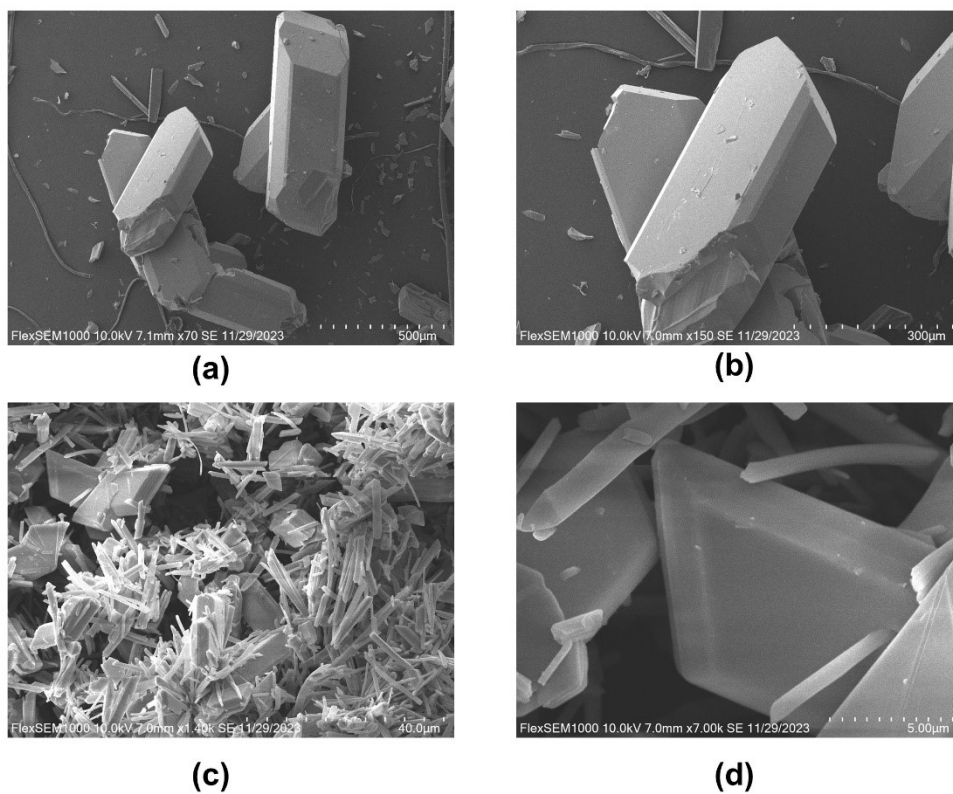

**Fig. S6** SEM images of the full (a) and partial (b) views of **Sm-fum-H<sub>2</sub>O** as well as the full (c) and partial (d) views of **Er-fum-12H<sub>2</sub>O**.

## VI. Characterization: Flexibility

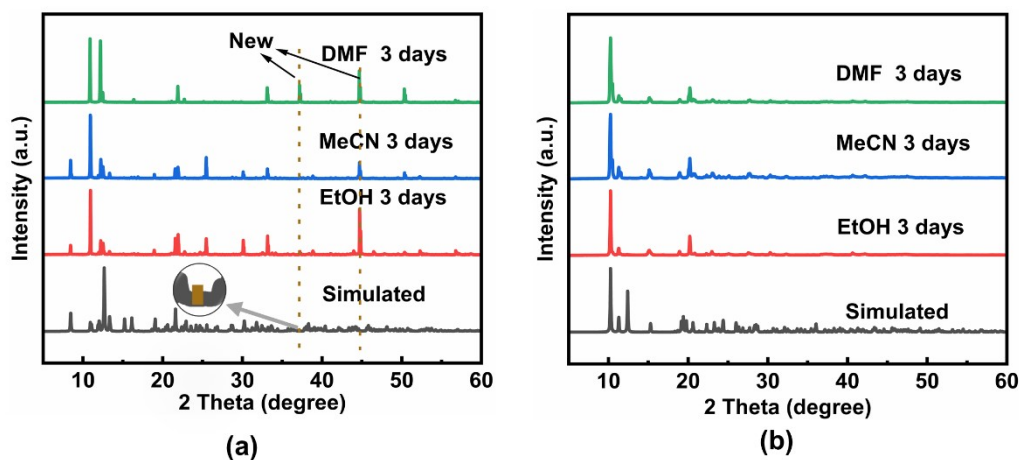

**Fig. S7** Flexibility characterization. PXR D patterns of **Sm-fum-7H<sub>2</sub>O** (a) and **Er-fum-12H<sub>2</sub>O** (b) treated with EtOH, MeCN and DMF.

To assess the flexibility of the MOF frameworks, we conducted experiments involving immersion in organic solvents on Sm-fum-7H<sub>2</sub>O and Er-fum-12H<sub>2</sub>O. Specifically, Sm-fum-7H<sub>2</sub>O and Er-fum-12H<sub>2</sub>O were immersed in ethanol (10 ml), acetonitrile (10 ml), and DMF (10 ml) for three days, respectively. Subsequently, the samples were recycled and subjected to XRD analysis. As shown in Figure S7a, the majority of characteristic peaks of Sm-fum-7H<sub>2</sub>O remained intact and some new peaks were observed at 37.17° and 44.78°, indicating that a slight deformation of the framework. In other words, Sm-fum-7H<sub>2</sub>O has a certain degree of flexibility, which is possibly associated with water molecules within the framework exchanging with the organic solvents. In contrast, no new peaks were observed in the XRD pattern of Er-fum-12H<sub>2</sub>O (Figure S7b), indicating a lack of flexibility and a higher degree of structural rigidity compared to Sm-fum-7H<sub>2</sub>O. However, the water-assisted proton conductivity measurements for these MOFs were carried out under ~97% RH condition, rather than in organic solvents. Besides, the PXR D patterns of Sm-fum-7H<sub>2</sub>O and Er-fum-12H<sub>2</sub>O almost remain unchanged following exposure to moisture, water, aqueous acidic and alkaline solutions. This indicates a good retention of their framework integrity, reflecting the inherent rigidity of these MOFs. Consequently, it can be concluded that the structural rigidity of these compounds remains largely unaffected under the tested conditions.

Furthermore, the potential changes in the arrangement of water clusters under the

measured conditions require a detailed single-crystal structure analysis for clarification. Unfortunately, suitable single crystals of Sm-fum-7H<sub>2</sub>O and Er-fum-12H<sub>2</sub>O are not available for such structural investigations, leaving the specific alterations in the arrangement of water clusters within the crystals unclear. However, a significant finding is that a good linear relationship was observed within the measured temperature range for both Sm-fum-7H<sub>2</sub>O and Er-fum-12H<sub>2</sub>O. The analysis yielded activation energies of 0.12 eV for Sm-fum-7H<sub>2</sub>O and 0.27 eV for Er-fum-12H<sub>2</sub>O. The fact that single values were determined for each MOF, rather than a range of values, implies a uniformity in the mechanisms. In other words, the arrangement of water clusters remains largely unchanged within the measured temperature range, providing some insight into the stability of the water cluster configuration in these MOFs.

The flexibility and rigidity of MOFs are indeed critical factors that significantly influence their proton-conducting properties. As demonstrated in previous studies, such as the investigation of the flexible MOF BUT-8(Cr)A, an increase in RH leads to a greater adsorption of water molecules within the framework.<sup>7</sup> The increase in water content enhances the number of available proton carriers and can establish more effective hydrogen bonding networks with the oxygen and nitrogen atoms in the organic ligands. The result facilitates the transportation of protons, highlighting the importance of MOF flexibility in enhancing proton conductivity under humid conditions. Further research by S. Kitagawa on the MOF material TJU-102 revealed exceptional proton conductivity attributed to its structural characteristics. The high density of free carboxyl (–COOH) groups within the pores of TJU-102 allows the framework to transition from a state of high rigidity to one of low flexibility, which is accompanied by tailored porosity. This unique combination of two properties results in remarkable proton conductivity, achieving values as high as  $5.26 \times 10^{-2} \text{ S cm}^{-1}$  at 363 K with 98% RH.<sup>8</sup> These findings revealed that the structural flexibility plays in optimizing the proton-conducting capabilities of MOFs, making them promising candidates for applications in fuel cells and other energy-related technologies.

## VII. Stability: TGA curves

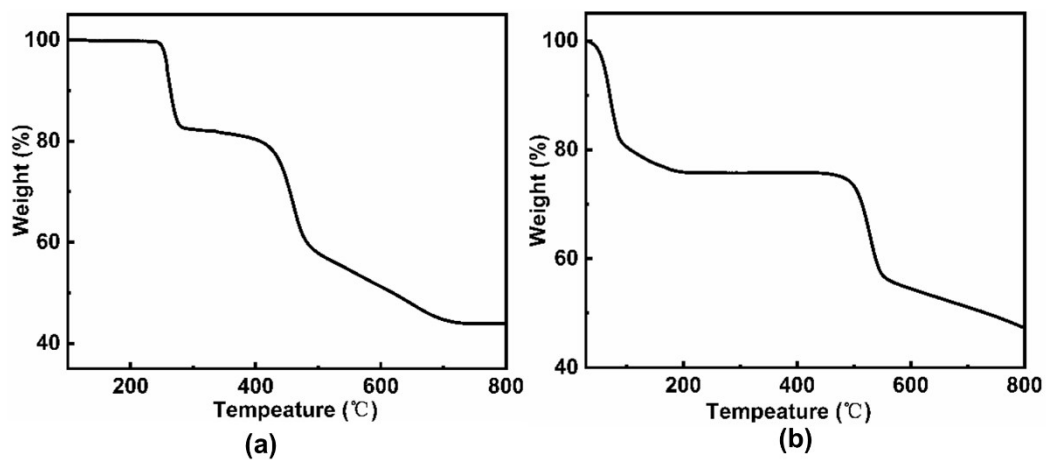

**Fig. S8** Thermogravimetric curves for **Sm-fum-H<sub>2</sub>O** (a) and **Er-fum-12H<sub>2</sub>O** (b).

## VIII. Hydrophilicity: water adsorption and water contact angle

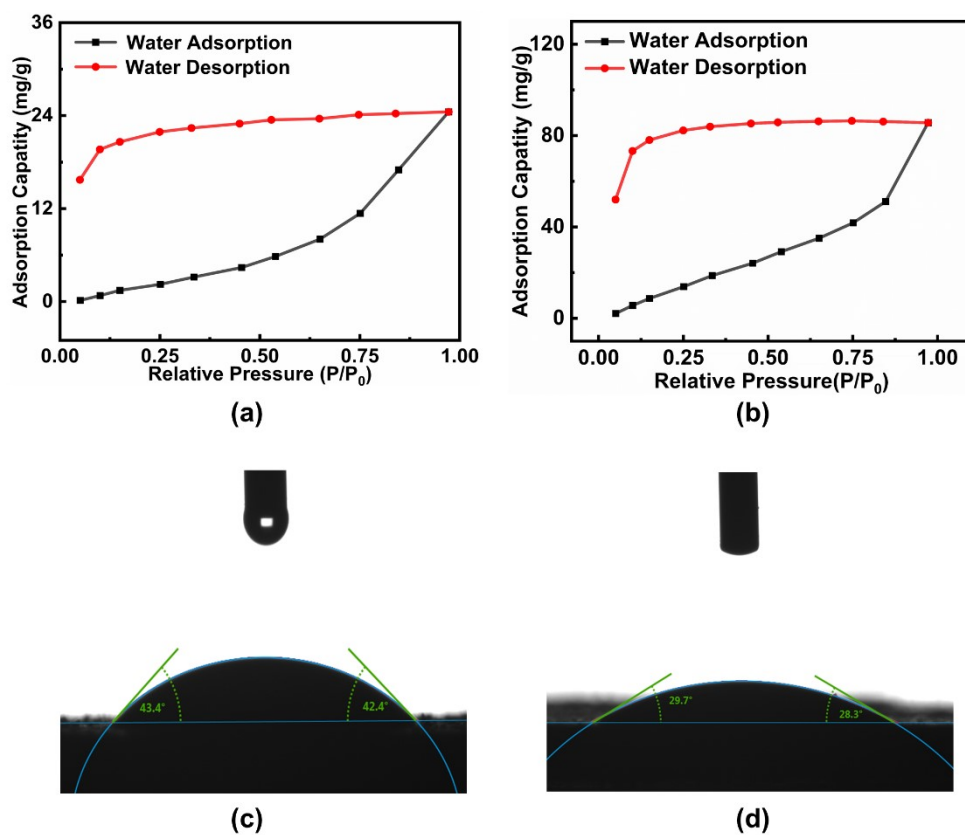

**Fig. S9** Water adsorption–desorption isotherms of **Sm-fum-7H<sub>2</sub>O** (a) and **Er-fum-12H<sub>2</sub>O** (b) at 298 K. Water contact angles of **Sm-fum-7H<sub>2</sub>O** (c) and **Er-fum-12H<sub>2</sub>O** (d) at 298 K.



## IX. Electrochemical measurements: impedance spectra

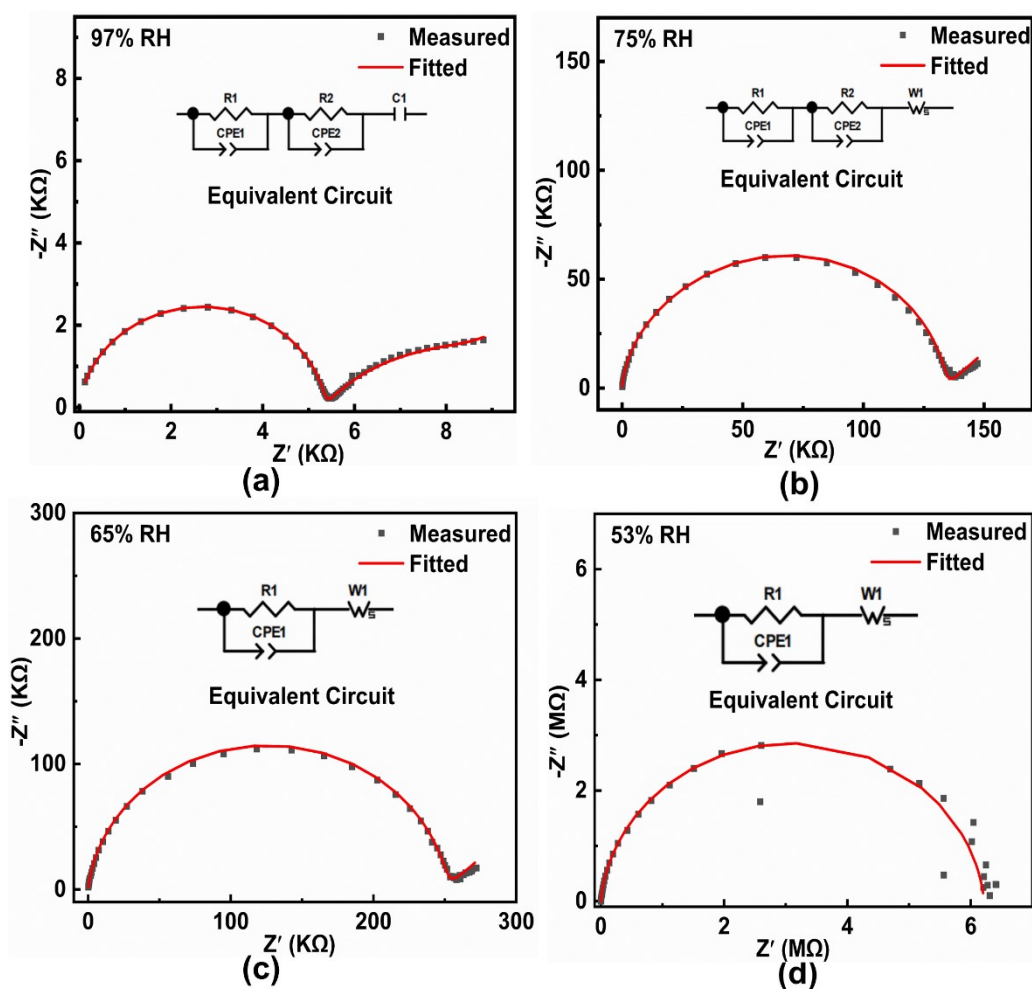

**Fig. S10** Nyquist plots of Sm-fum-H<sub>2</sub>O under 97% (a), 75% (b), 65% (c), and 53% (d) RHs (relative humidities) at 298 K (R1, bulk resistor; R2, grain boundary resistor; CPE, constant phase element; W1, Warburg diffusion element).

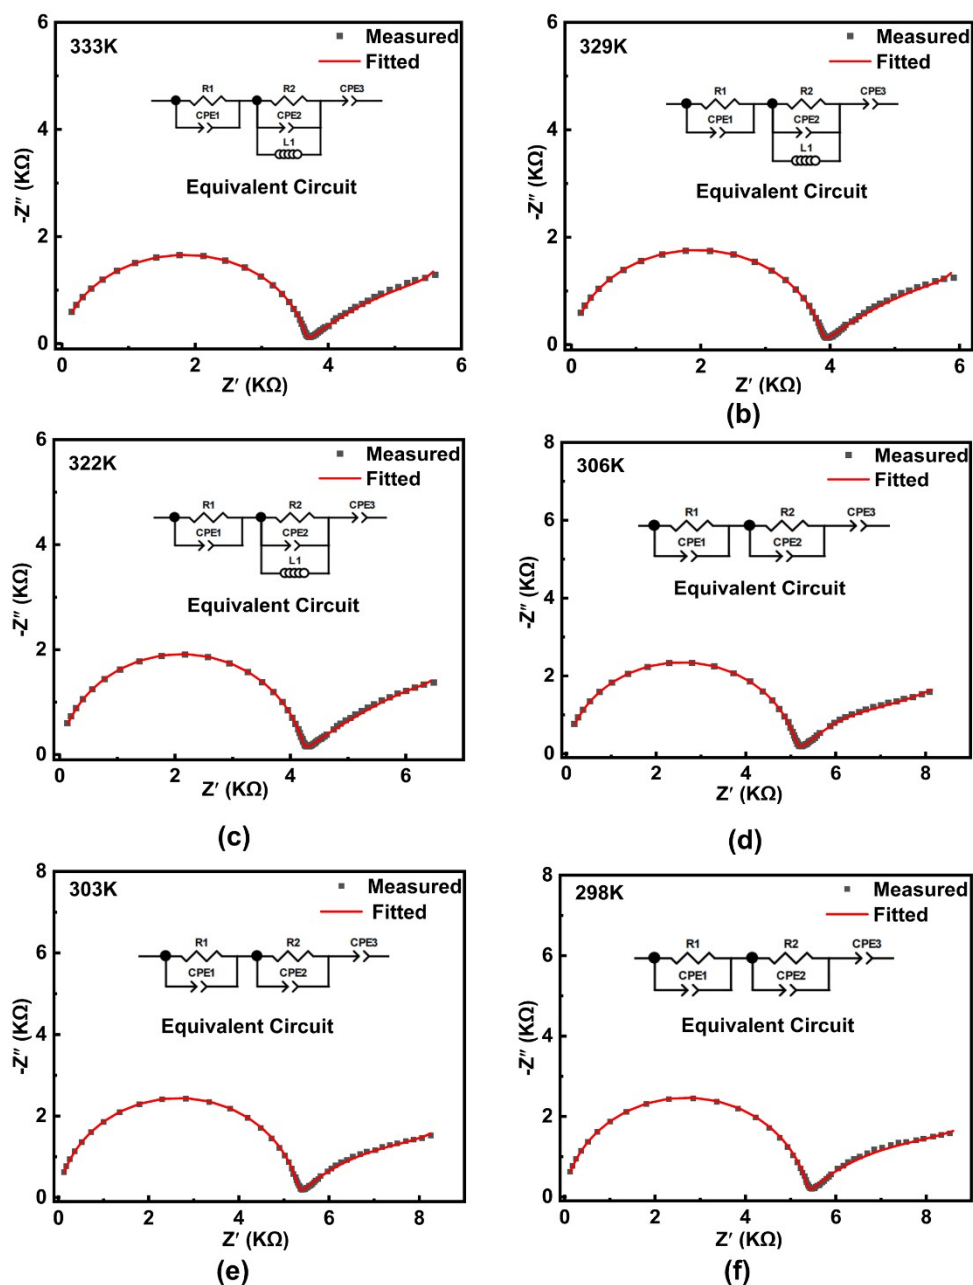

**Fig. S11** Nyquist plots of  $\text{Sm-fum-H}_2\text{O}$  at 333 K (a), 329 K (b), 322 K (c), 306 K (d), 303 K (e) and 298 K (f) under  $\sim 97\%$  RH (R1, bulk resistor; R2, grain boundary resistor; CPE, constant phase element; L1, inductor).

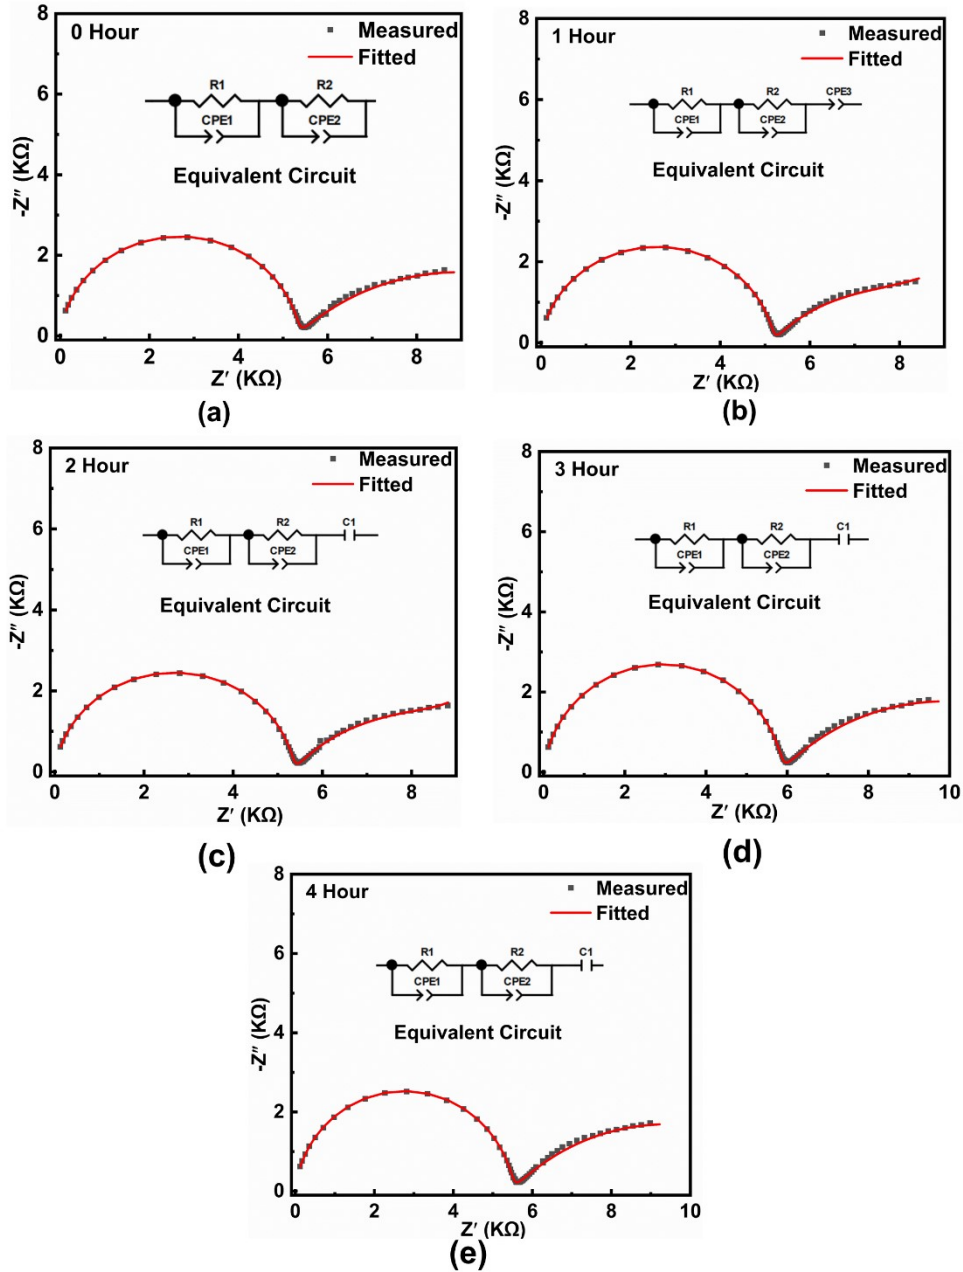

**Fig. S12** Nyquist plots of **Sm-fum-H<sub>2</sub>O** at 0 h (a), 1 h (b), 2 h (c), 3 h (d) and 4 h (f) under 298 K and ~97% RH conditions ( $R1$ , bulk resistor;  $R2$ , grain boundary resistor; CPE, constant phase element).

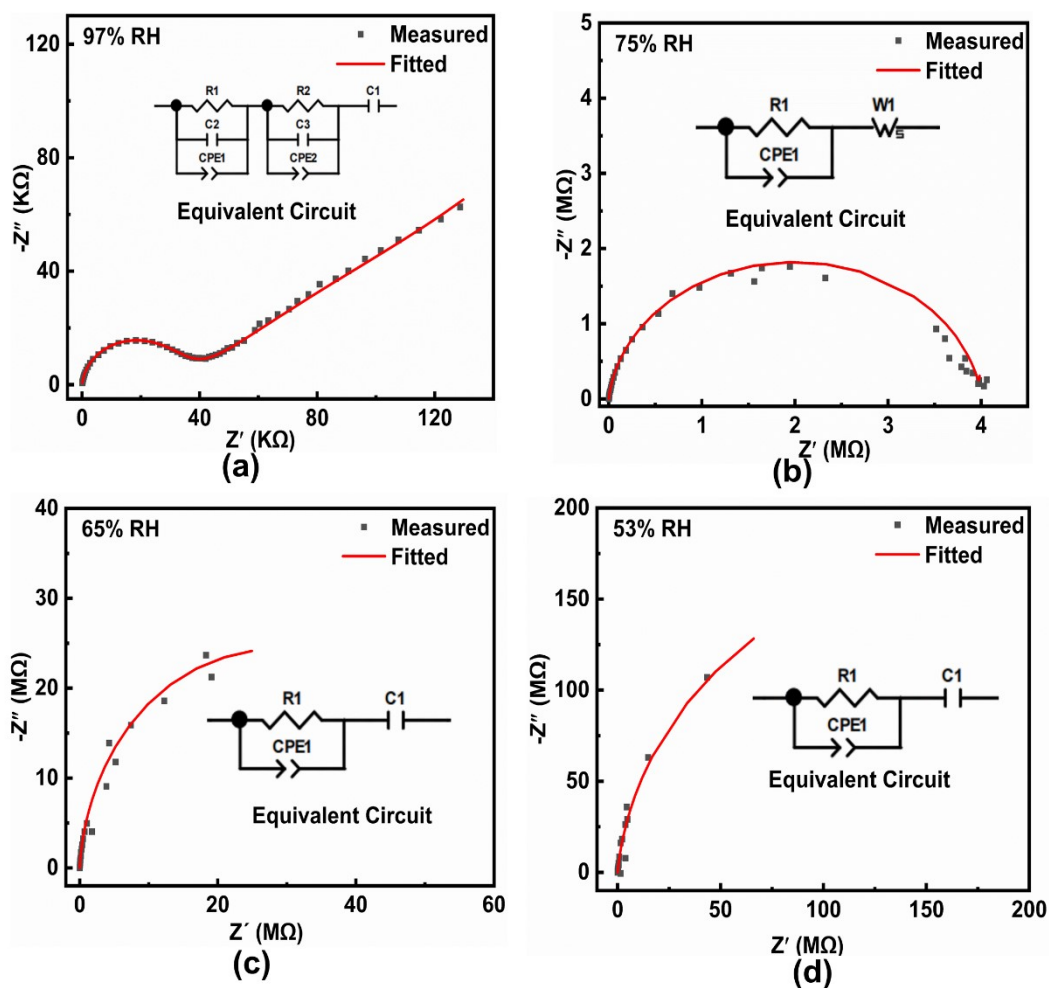

**Fig. S13** Nyquist plots of  $\text{Er-fum-12H}_2\text{O}$  under  $\sim 97\%$  (a),  $\sim 75\%$  (b),  $\sim 65\%$  (c) and  $\sim 53\%$  (d) RHs at 298 K ( $R1$ , bulk resistor;  $R2$ , grain boundary resistor; CPE, constant phase element;  $W1$ , Warburg diffusion element).

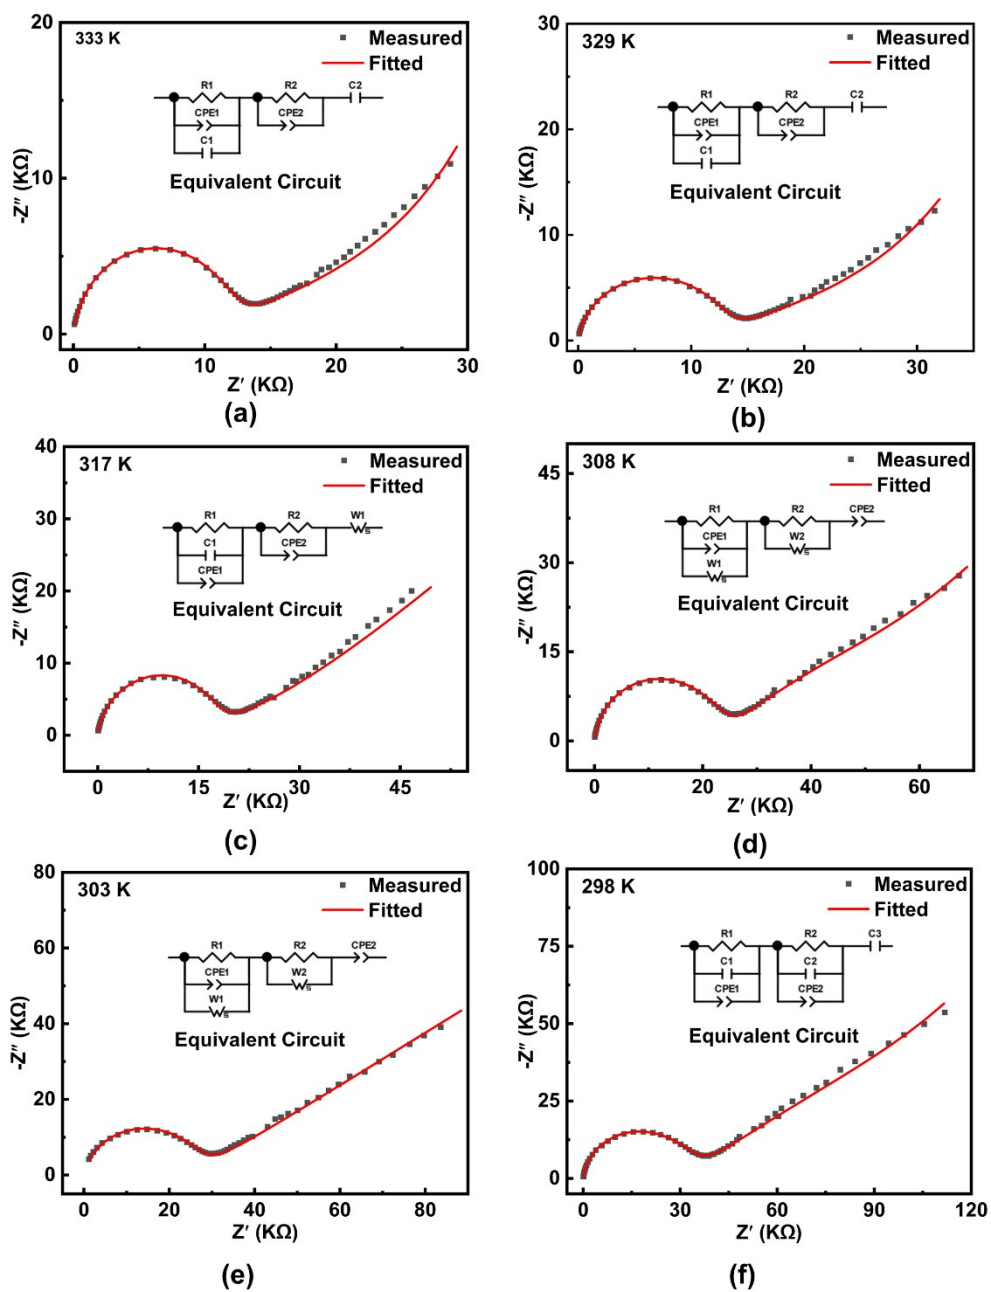

**Fig. S14** Nyquist plots of  $\text{Sm-fum-H}_2\text{O}$  at 333 K (a), 329 K (b), 322 K (c), 306 K (d), 303 K (e) and 298 K (f) under  $\sim 97\%$  RH ( $R1$ , bulk resistor;  $R2$ , grain boundary resistor; CPE, constant phase element;  $W1$  and  $W2$ , Warburg diffusion element;  $L1$ , inductor).

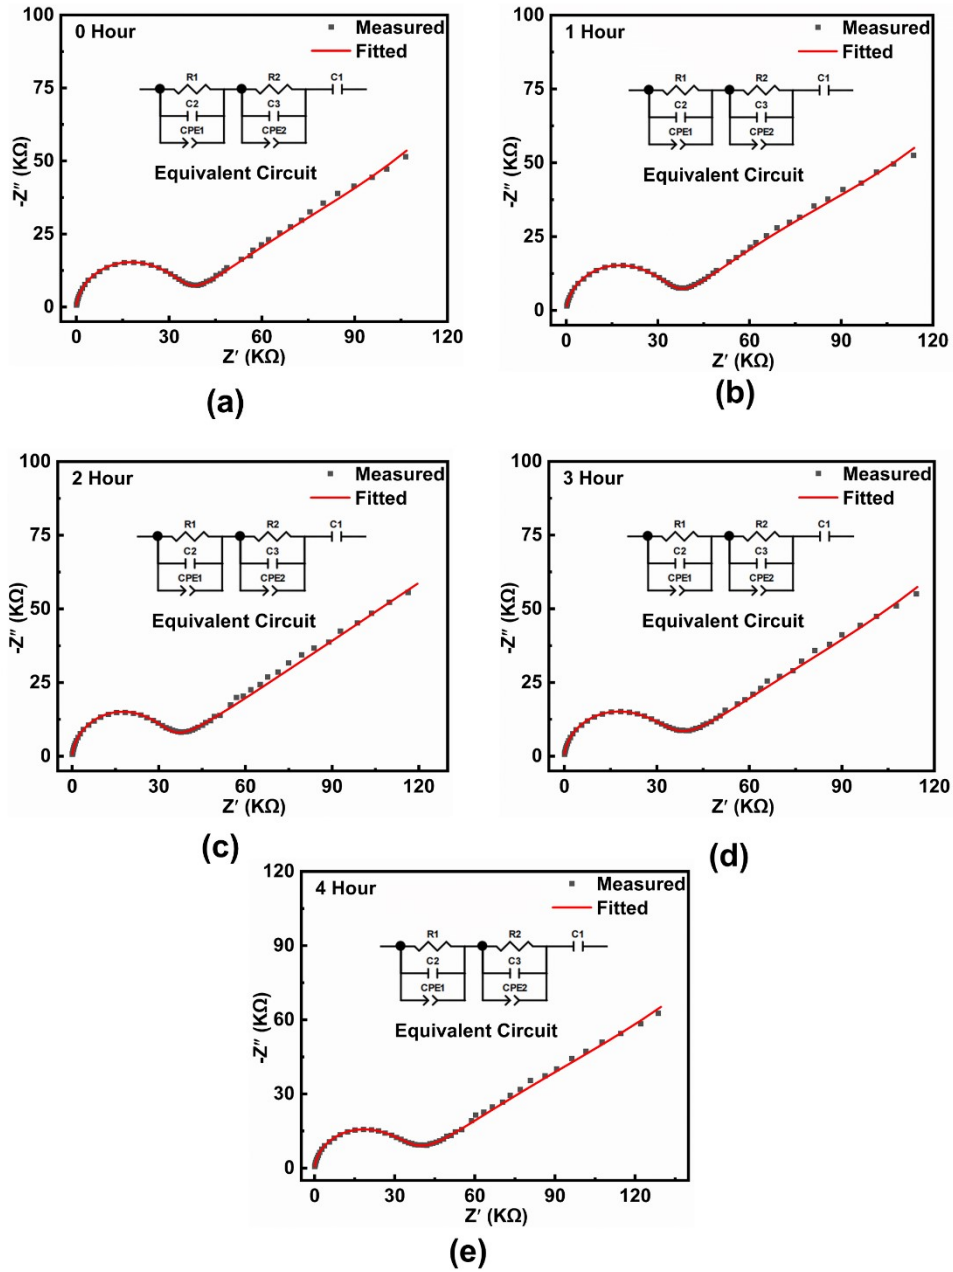

**Fig. S15** Nyquist plots of **Er-fum-12H<sub>2</sub>O** at 0 h (a), 1 h (b), 2 h (c), 3 h (d) and 4 h (f) under 298 K and ~97% RH conditions (R1, bulk resistor; R2, grain boundary resistor; CPE, constant phase element).

## X. PXRD patterns after impedance measurements.

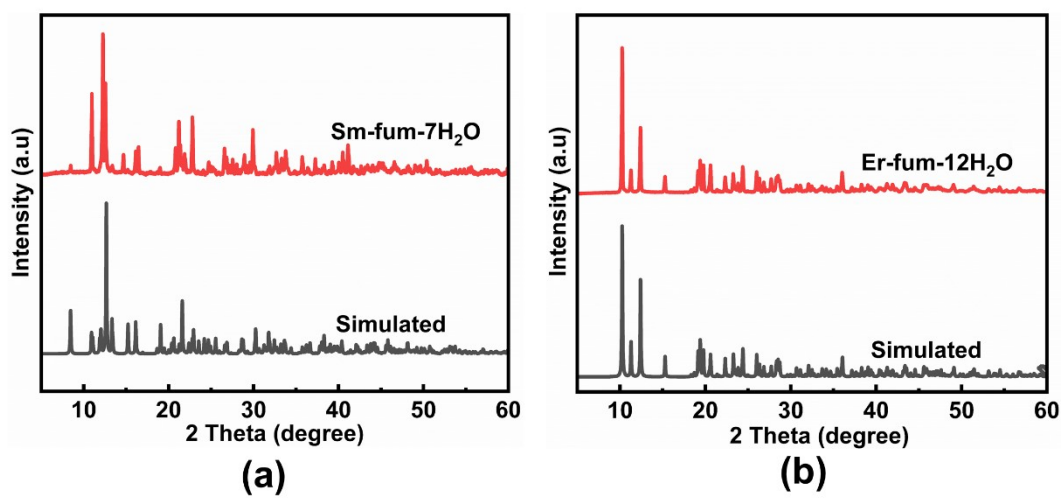

**Fig. S16** PXRD patterns of simulations based on single-crystal analysis and after the impedance measurements for **Sm-fum-7H<sub>2</sub>O** (a) and **Er-fum-H<sub>2</sub>O** (b).

## XI. DC conductivity and activation energy

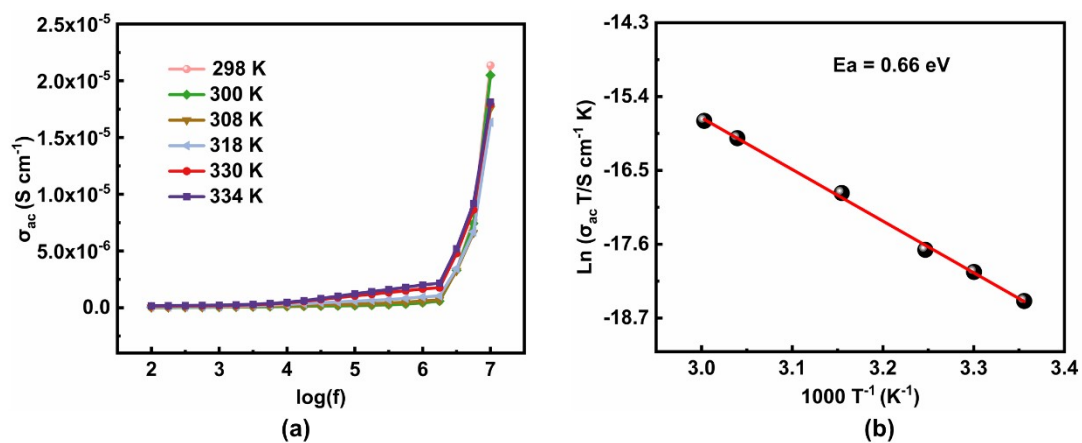

**Fig. S17** Frequency dependence of the DC conductivity at different temperatures from  $10^2$  to  $10^7$  Hz for Er-fum-12H<sub>2</sub>O (a) and activation energy (b).



## XII. Differential scanning calorimeter measurements

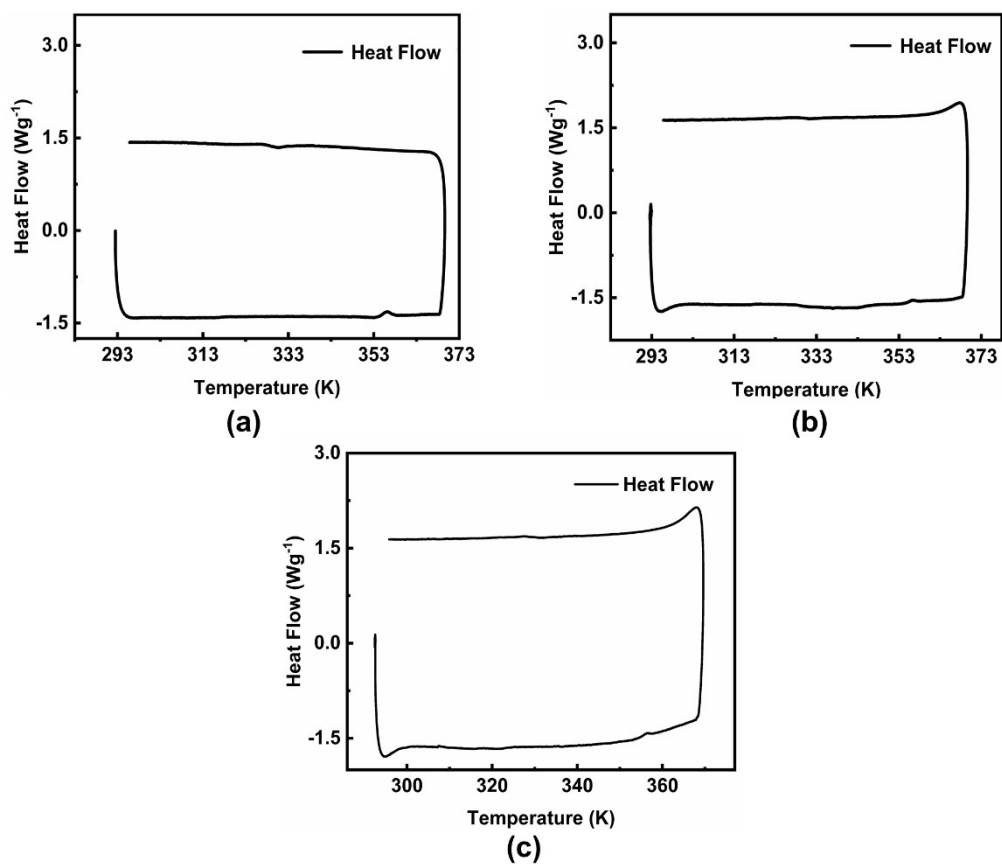

**Fig. S18** DSC (Differential Scanning Calorimeter) curves of **Sm-fum-7H<sub>2</sub>O** (a), **Er-fum-12H<sub>2</sub>O** (b) and **blank sample** (c).

### XIII. Dielectric spectrum

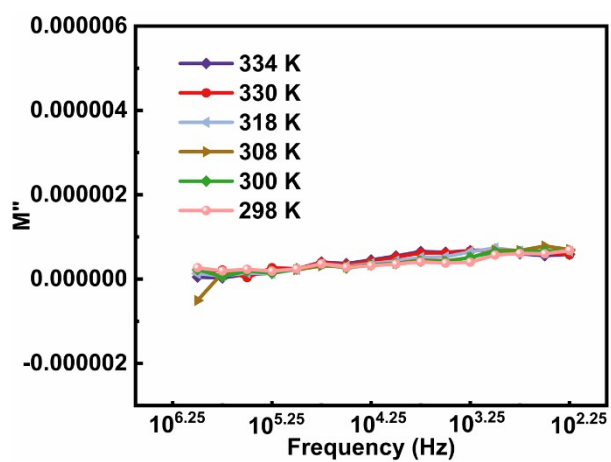

**Fig. S19** Frequency dependence of the imaginary part of electric modulus at different temperatures from  $10^{2.25}$  to  $10^{6.25}$  Hz for **Sm-fum-7H<sub>2</sub>O**.

## XIV. Comparison of chemical stability

Table S4 Comparison of chemical stability of **Sm-fum-7H<sub>2</sub>O** and **Er-fum-12H<sub>2</sub>O** with reported MOF materials

| Materials                                                                              | pH range | Time (day or hour) | References |
|----------------------------------------------------------------------------------------|----------|--------------------|------------|
| Sm-fum-7H <sub>2</sub> O                                                               | 2–12     | 24 hours           | This work  |
| Er-fum-12H <sub>2</sub> O                                                              | 2–12     | 3 days             | This work  |
| Cd-EDDA <sup>[a]</sup>                                                                 | 2–12     | 24 hours           | 9          |
| COF-PDAN-AO                                                                            | 1–13     | 6 hours            | 10         |
| BUT-155 <sup>[b]</sup>                                                                 | 4–10     | 24 hours           | 11         |
| oCB-MOF-1 <sup>[c]</sup>                                                               | 2–12     | 15 hours           | 12         |
| PCN-600(Fe)                                                                            | 2–11     | 24 hours           | 13         |
| PCN-250(Fe <sub>2</sub> Co)                                                            | 1–12     | 24 hours           | 14         |
| PCN-777                                                                                | 3–11     | 12 hours           | 15         |
| [Cd <sub>2</sub> (L <sub>1</sub> )(1,4-NDC) <sub>2</sub> ] <sub>n</sub> <sup>[d]</sup> | 3–13     | 48 hours           | 16         |
| [Cd(L <sub>2</sub> )(1,4-NDC)] <sub>n</sub> <sup>[e]</sup>                             | 3–13     | 48 hours           | 16         |
| Eu-MOF <sup>[f]</sup>                                                                  | 3–11     | 48 hours           | 17         |

<sup>[a]</sup> H<sub>4</sub>EDDA = 5,5'-(ethane-1,2-diylbis(oxy))diisophthalic acid. <sup>[b]</sup> BUT = [Cu<sub>4</sub>(tdhb)], H<sub>8</sub>tdhb = 3,3',5,5'-tetra(3,5-dicarboxyphenyl)-2,2',4,4',6,6'-hexamethylbiphenyl). <sup>[c]</sup> oCB-MOF-1 = [Zn<sub>4</sub>(μ<sub>4</sub>-bdc)<sub>2</sub>(μ<sub>2</sub>-oCB-L)<sub>2</sub>(μ<sub>3</sub>-O)<sub>2</sub>·(DMF)<sub>2</sub>]<sub>n</sub>·4DMF, H<sub>2</sub>bdc = 1,4-benzenedicarboxylate, oCB-L = 1,2-bis{(pyridin-3-yl)methanol}-1,2-dicarba-closo-dodecarborane. <sup>[d]</sup> L<sub>1</sub> = 1,4-bis(benzimidazol-1-yl)-2-butylene, 1,4-H<sub>2</sub>NDC = 1,4-naphthalenedicarboxylic acid. <sup>[e]</sup> L<sub>2</sub> = 1,4-bis(2-methylbenzimidazol-1-yl)-2-butylene. <sup>[f]</sup> Eu-MOF = [Me<sub>2</sub>NH<sub>2</sub>]<sub>2</sub>(Eu)<sub>2</sub>(ofdp)<sub>2</sub>(DMF)(H<sub>2</sub>O)]·7H<sub>2</sub>O·DMF, H<sub>4</sub>ofdp = 5,5'-(9-oxo-9H-fluorene-2,7-diyl)diisophthalic acid.

## XV. Comparison of proton conductivity

Table S5 Comparison of proton conductivity of **Sm-fum-7H<sub>2</sub>O** and **Er-fum-12H<sub>2</sub>O** with some reported proton conductors

| Materials                                                                                                                      | $\sigma$<br>(S cm <sup>-1</sup> ) | $Ea$<br>(eV) | $T$<br>(K) | $RH$<br>(%) | Reference |
|--------------------------------------------------------------------------------------------------------------------------------|-----------------------------------|--------------|------------|-------------|-----------|
| Sm-fum-7H <sub>2</sub> O                                                                                                       | $6.9 \times 10^{-4}$              | 0.12         | 333        | 97          | This work |
| Er-fum-12H <sub>2</sub> O                                                                                                      | $1.6 \times 10^{-4}$              | 0.27         | 333        | 97          | This work |
| [Ni <sub>2</sub> (dobdc)(H <sub>2</sub> O) <sub>2</sub> ] · 6H <sub>2</sub> O <sup>[a]</sup>                                   | $1.4 \times 10^{-4}$              | 0.12         | 353        | 95          | 18        |
| Ni <sub>2</sub> (dobdc)                                                                                                        | $1.4 \times 10^{-4}$              | -            | 353        | 95          | 18        |
| Zn-pzdc-H <sub>3</sub> O <sup>+[b]</sup>                                                                                       | $2.42 \times 10^{-3}$             | 0.21         | 323        | 97          | 19        |
| Mn-pzdc-H <sub>3</sub> O <sup>+</sup>                                                                                          | $2.03 \times 10^{-3}$             | 0.10         | 323        | 97          | 19        |
| Cu-Hpzdc-H <sub>2</sub> O                                                                                                      | $1.68 \times 10^{-3}$             | 0.35         | 323        | 97          | 19        |
| Co-2PPA <sup>[c]</sup>                                                                                                         | $2.96 \times 10^{-4}$             | 0.29         | 333        | 97          | 20        |
| Co-4PPA                                                                                                                        | $2.78 \times 10^{-5}$             | 0.31         | 333        | 97          | 20        |
| Zr(L) <sub>2</sub> X <sub>2</sub> H <sub>2</sub> · 5H <sub>2</sub> O <sup>[d]</sup>                                            | $1 \times 10^{-4}$                | 0.23         | 353        | 95          | 21        |
| {[Gd(ma)(ox)(H <sub>2</sub> O)] <sub>n</sub> · 3H <sub>2</sub> O} <sup>[e]</sup>                                               | $4.7 \times 10^{-4}$              | 0.88         | 353        | 95          | 22        |
| {[Dy(ma)(ox)(H <sub>2</sub> O)] <sub>n</sub> · 1.5H <sub>2</sub> O}                                                            | $9.06 \times 10^{-5}$             | 0.70         | 353        | 95          | 22        |
| MOF-808-OX                                                                                                                     | $4.25 \times 10^{-4}$             | 0.14         | 353        | 98          | 23        |
| [Mg(2,2',6,6'-BPTC) <sub>0.5</sub> (H <sub>2</sub> O) <sub>3</sub> ] · 5H <sub>2</sub> O <sup>[f]</sup>                        | $2.6 \times 10^{-4}$              | 0.47         | 373        | 98          | 24        |
| Fe-MOF                                                                                                                         | $1.25 \times 10^{-4}$             | 0.385        | 333        | 98          | 25        |
| [Cu <sub>4</sub> (HDMPHIDC) <sub>4</sub> (H <sub>2</sub> O) <sub>4</sub> ] <sub>n</sub> <sup>[g]</sup>                         | $1.3 \times 10^{-4}$              | 0.95         | 373        | 98          | 26        |
| {[Cd(p-TIPhH <sub>2</sub> IDC) <sub>2</sub> ] · H <sub>2</sub> O} <sub>n</sub> <sup>[h]</sup>                                  | $1.24 \times 10^{-4}$             | 0.32         | 373        | 98          | 27        |
| [Cu(bpdc)(H <sub>2</sub> O) <sub>2</sub> ] <sub>n</sub> <sup>[i]</sup>                                                         | $1.55 \times 10^{-4}$             | -            | 373        | 98          | 28        |
| {[Co(BPTA)(BDA)](DMF) · 1.3 H <sub>2</sub> O} <sub>n</sub> <sup>[j]</sup>                                                      | $9.5 \times 10^{-4}$              | -            | 353        | 98          | 29        |
| {[Co(BPTA)(OBA)](2DMF) · 6H <sub>2</sub> O} <sub>n</sub> <sup>[k]</sup>                                                        | $6.6 \times 10^{-4}$              | -            | 353        | 98          | 30        |
| [(CuI 4CuII 4NTAA <sub>4</sub> ) · 3H <sub>2</sub> O] <sub>n</sub>                                                             | $4.9 \times 10^{-4}$              | 0.39         | 373        | 98          | 30        |
| UiO-66-AS                                                                                                                      | $1.7 \times 10^{-4}$              | -            | 353        | 98          | 31        |
| {[Co <sub>3</sub> (p-ClPhHIDC) <sub>3</sub> (H <sub>2</sub> O) <sub>3</sub> ] · 6H <sub>2</sub> O} <sub>n</sub> <sup>[l]</sup> | $2.47 \times 10^{-4}$             | 0.20         | 363        | 93          | 32        |
| {[Co <sub>3</sub> (m-BrPhIDC) <sub>2</sub> (H <sub>2</sub> O) <sub>6</sub> ] · 2H <sub>2</sub> O} <sub>n</sub>                 | $7.64 \times 10^{-4}$             | 0.56         | 373        | 98          | 32        |
| [Zn(o-BrPhH <sub>2</sub> IDC) <sub>2</sub> (H <sub>2</sub> O) <sub>2</sub> ] · EtOH · 3H <sub>2</sub> O <sup>[m]</sup>         | $1.14 \times 10^{-4}$             | 0.72         | 373        | 98          | 33        |
| [Co(o-BrPhH <sub>2</sub> IDC) <sub>2</sub> (H <sub>2</sub> O) <sub>2</sub> ] · EtOH · 3H <sub>2</sub> O                        | $3.11 \times 10^{-4}$             | 0.89         | 373        | 98          | 33        |
| [{(H <sub>3</sub> O)[Eu(SBDB)(H <sub>2</sub> O) <sub>2</sub> ]}]                                                               | $1.0 \times 10^{-4}$              | 0.48         | 338        | 98          | 34        |

|                                                                                                                                                        |                       |       |     |    |    |
|--------------------------------------------------------------------------------------------------------------------------------------------------------|-----------------------|-------|-----|----|----|
| JXNU-7(Eu) <sup>[n]</sup>                                                                                                                              | $1.04 \times 10^{-4}$ | 0.34  | 358 | 98 | 35 |
| Tb-DSOA                                                                                                                                                | $1.66 \times 10^{-4}$ | 0.45  | 373 | 98 | 36 |
| CuH(Hspip)(HPO <sub>4</sub> ) <sub>2</sub> H <sub>2</sub> O <sup>[o]</sup>                                                                             | $6.90 \times 10^{-4}$ | 0.68  | 368 | 97 | 37 |
| UMOM-100-b                                                                                                                                             | $2.11 \times 10^{-4}$ | 0.66  | 353 | 90 | 38 |
| [Pr(betc)(H <sub>2</sub> O) <sub>2</sub> ]<br>(H <sub>2</sub> pip) <sub>0.5</sub> ] <sub>n</sub> <sup>[p]</sup>                                        | $8.9 \times 10^{-5}$  | 0.33  | 313 | 97 | 39 |
| PPA                                                                                                                                                    | $2.49 \times 10^{-5}$ | 0.27  | 325 | 97 | 40 |
| [Cu(PPA)I]                                                                                                                                             | $1.64 \times 10^{-4}$ | 0.19  | 325 | 97 | 40 |
| [Co(PPA) <sub>2</sub> (BDC)(H <sub>2</sub> O) <sub>2</sub> ·(PPA) <sub>2</sub><br>(H <sub>2</sub> BDC) <sub>2</sub> (H <sub>2</sub> O)] <sup>[q]</sup> | $2.29 \times 10^{-4}$ | 0.24  | 325 | 97 | 40 |
| JUC-125 <sup>[r]</sup>                                                                                                                                 | $1.5 \times 10^{-4}$  | 0.32  | 323 | 97 | 41 |
| {[Pr <sub>2</sub> Ca(betc) <sub>2</sub> (H <sub>2</sub> O) <sub>7</sub> ]<br>H <sub>2</sub> O} <sub>n</sub>                                            | $3.2 \times 10^{-5}$  | 0.66  | 305 | 97 | 42 |
| OCC 2 <sup>[s]</sup>                                                                                                                                   | $3.72 \times 10^{-4}$ | 0.21  | 299 | 97 | 43 |
| LOF 1 <sup>[t]</sup>                                                                                                                                   | $9.3 \times 10^{-5}$  | 0.33  | 303 | 97 | 44 |
| PMOCP 3 <sup>[u]</sup>                                                                                                                                 | $1.38 \times 10^{-4}$ | 0.14  | 323 | 97 | 45 |
| Co-ppca-2D <sup>[v]</sup>                                                                                                                              | $3.21 \times 10^{-5}$ | 0.193 | 333 | 97 | 46 |

Note:  $\sigma$  = proton conductivity (S cm<sup>-1</sup>).  $E_a$  = activation energy (eV). T = temperature (K). RH = relative humidity (%). <sup>[a]</sup> dobdc = 2,5-dioxido-1,4-benzenedicarboxylate. <sup>[b]</sup> H<sub>2</sub>pzdc = 2,3-pyrazinedicarboxylic acid. <sup>[c]</sup> PPA = 4-(3-pyridinyl)-2-amino pyrimidine. <sup>[d]</sup> L = (O<sub>3</sub>PCH<sub>2</sub>)<sub>2</sub>N-C<sub>6</sub>H<sub>10</sub>-N(O<sub>3</sub>CH<sub>2</sub>P)<sub>2</sub>, X = H, Na<sup>+</sup>, NH<sub>4</sub><sup>+</sup>. <sup>[e]</sup> H<sub>2</sub>L = mucic acid, H<sub>2</sub>Ox = oxalic acid. <sup>[f]</sup> BPTC = 2,2',6,6'-tetracarboxybiphenyl. <sup>[g]</sup> HDMPHIDC = 2-(3,4-dimethylphenyl)-4,5-imidazole dicarboxylic acid. <sup>[h]</sup> p-TIPhH<sub>2</sub>IDC = 2-p-(1*H*-1,2,4-triazolyl)phenyl-1*H*-4,5-imidazole dicarboxylic acid. <sup>[i]</sup> H<sub>2</sub>bpdc = 2,2'-bipyridyl-3,3'-dicarboxylic acid. <sup>[j]</sup> BDA = benzene-1,3-diacrylic acid. <sup>[k]</sup> OBA = dicarboxylates 4,4'-oxybisbenzoic acid. <sup>[l]</sup> p-ClPhH<sub>3</sub>IDC = 2-(p-chlorophenyl)-imidazole-4,5-dicarboxylic acid. <sup>[m]</sup> o-BrPhH<sub>2</sub>IDC = 2-(o-bromo phenyl)-4,5-imidazole dicarboxylic acid. <sup>[n]</sup> XNU-7 = {[Ln<sub>3</sub>(μ<sub>2</sub>-OH)(DSNPDC)<sub>2</sub>(H<sub>2</sub>O)<sub>x</sub>·yH<sub>2</sub>O]<sub>n</sub>, H<sub>4</sub>-DSNPDC = 5,7-disulfonate-1,4-naphthalenedicarboxylic acid. <sup>[o]</sup> Hspip = 2-sulfophenylimidazo(4,5-f)(1,10)-phenanthroline. <sup>[p]</sup> H<sub>4</sub>betc = 1,2,4,5-benzenetetra-carboxylic acid, pip = piperazine. <sup>[q]</sup> H<sub>2</sub>BDC = 1,4-benzenedicarboxylic acid. <sup>[r]</sup> JUC-125 = {[Gd<sub>4</sub>(R-ttpc)<sub>2</sub>(R-Httpc)<sub>2</sub>(HCOO)<sub>2</sub>(H<sub>2</sub>O)<sub>8</sub>·4H<sub>2</sub>O]<sub>n</sub>, R-H<sub>3</sub>ttpc = (3*R*,3'*R*,3''*R*)-1,1',1''-(1,3,5-triazine-2,4,6-triyl)-tripiperidine-3-carboxylic acid. <sup>[s]</sup> OCC2 = (H<sub>3</sub>betc)<sub>2</sub>(H<sub>2</sub>-Mepip)·(H<sub>2</sub>O), Hopip = homopiperazine. <sup>[t]</sup> LOF 1 = {[Er<sub>3</sub>(pmpc)(C<sub>2</sub>O<sub>4</sub>)<sub>3</sub>(H<sub>2</sub>O)<sub>7</sub>·2H<sub>2</sub>O]<sub>n</sub>, D-H<sub>3</sub>pmpc = D-1-(phosphonomethyl)piperidine-3-carboxylic acid. <sup>[u]</sup> PMOCP3 = {Cd(D-pmpcH)(H<sub>2</sub>O)<sub>2</sub>Cl<sub>2</sub>]<sub>n</sub>, D-H<sub>3</sub>pmpc = 1-(phosphonomethyl)piperidine-3-carboxylic acid. <sup>[v]</sup> H<sub>2</sub>ppca = 5-(pyridin-3-yl)-1*H*-pyrazole-3-carboxylic acid)

## XVI. Fitting of Cole-Cole plots

Table S6  $M_0$ ,  $M_\infty$  and  $\alpha$  parameters obtained from the best fits for **Er-fum-12H<sub>2</sub>O**.

| $T / \text{K}$ | $M_0$   | $M_\infty$            | $\alpha$ | $R^2$ |
|----------------|---------|-----------------------|----------|-------|
| 298 K          | 0.00661 | $2.18 \times 10^{-4}$ | 0.607    | 0.967 |
| 306 K          | 0.00672 | $2.14 \times 10^{-4}$ | 0.592    | 0.966 |
| 320 K          | 0.00729 | $2.10 \times 10^{-4}$ | 0.576    | 0.956 |
| 330 K          | 0.00741 | $1.96 \times 10^{-4}$ | 0.571    | 0.954 |
| 334 K          | 0.00756 | $1.80 \times 10^{-4}$ | 0.566    | 0.951 |

## XVII. Comparison of dielectric constant

Table S7 Comparison of dielectric constant of **Sm-fum-7H<sub>2</sub>O** and **Er-fum-12H<sub>2</sub>O** with some reported proton conductors

| Materials                                                                                                                                | Dielectric constant | Frequency (Hz)  | Reference |
|------------------------------------------------------------------------------------------------------------------------------------------|---------------------|-----------------|-----------|
| Sm-fum-7H <sub>2</sub> O                                                                                                                 | $2.22 \times 10^3$  | $10^{2.5}$      | This work |
| Er-fum-12H <sub>2</sub> O                                                                                                                | $4.95 \times 10^5$  | $10^2$          | This work |
|                                                                                                                                          | $1.42 \times 10^5$  | $10^{2.5}$      | This work |
| Co-2PPA <sup>[a]</sup>                                                                                                                   | 620                 | $10^2$          | 21        |
| Co-4PPA                                                                                                                                  | 630                 | $10^2$          | 21        |
| (CBQ)CuI 3(CN) <sub>3</sub> Br <sup>[b]</sup>                                                                                            | 119.3               | -               | 47        |
| [(CBQ)CuI 3(CN) <sub>3</sub> Br] <sub>n</sub>                                                                                            | $1.8 \times 10^6$   | $10^2$          | 47        |
| [Sm <sub>2</sub> (bhc)(H <sub>2</sub> O) <sub>6</sub> ] <sub>n</sub> <sup>[c]</sup>                                                      | 45.1                | $5 \times 10^3$ | 48        |
| [Mn <sub>3</sub> (HCOO) <sub>6</sub> ](C <sub>2</sub> H <sub>5</sub> OH)                                                                 | 45                  | -               | 49        |
| Co <sub>2</sub> (1,4-bdc) <sub>2</sub> (dabco)·[4DMF·1H <sub>2</sub> O] <sup>[d]</sup>                                                   | $5 \times 10^3$     | $10^2$          | 50        |
| Na[In <sub>3</sub> (odpt) <sub>2</sub> (OH) <sub>2</sub> (H <sub>2</sub> O) <sub>2</sub> ](H <sub>2</sub> O) <sub>4</sub> <sup>[e]</sup> | 40.5                | $10^3$          | 51        |
| Cu:PI-Bpy (1:2) <sup>[g]</sup>                                                                                                           | 133                 | $10^2$          | 52        |
| (EMI) <sub>2</sub> [Zn <sub>3</sub> (1,2,4,5-BTC) <sub>2</sub> ·2H <sub>2</sub> O] <sub>n</sub> <sup>[h]</sup>                           | $5.6 \times 10^6$   | $10^2$          | 53        |
| CaCu <sub>3</sub> Ti <sub>4</sub> O <sub>12</sub>                                                                                        | $10^5$              | 20              | 54        |
| [CdCl(TBP)] <sub>n</sub> <sup>[i]</sup>                                                                                                  | $1.2 \times 10^7$   | $10^2$          | 55        |
| MAPbBr <sub>3</sub>                                                                                                                      | 25.5                | -               | 56        |
| HNi-MOF-74-DMSO <sup>[j]</sup>                                                                                                           | 47                  | -               | 57        |

<sup>[a]</sup> PPA = 4-(3-pyridinyl)-2-amino pyrimidine. <sup>[b]</sup> CBQ-Br = N-4-cyanobenzyl quinidinium. <sup>[c]</sup> H<sub>6</sub>bhc = benzenehexacarboxylic acid. <sup>[d]</sup> 1,4-bdc = 1,4-benzenedicarboxylate anions, dabco = 1,4-diazabicyclo [2.2.2] octane. <sup>[e]</sup> odpt = 4,4'-oxydiphthalate. <sup>[f]</sup> btc = 1,2,3-benzenetricarboxylate. <sup>[g]</sup> Bpy = (5,5'-bis[(4-amino)phenoxy]-2,2'-bipyrimidine). <sup>[h]</sup> [EMI]Br = 1-ethyl-3-methyl imidazolium bromide, 1,2,4,5-BTC = 1,2,4,5-benzenetetracarboxylate. <sup>[i]</sup> H-TBP = N-(4-(1H-tetrazol-5-yl)benzyl)proline. <sup>[j]</sup> DMSO = Dimethyl sulfoxide.

## XVIII. Comparison of dielectric constant and proton conductivity

Table S8 The comparison of the proton conductivity and dielectric functions of **Sm fum-7H<sub>2</sub>O** and **Er-fum-12H<sub>2</sub>O**.

| Materials                                                                                                                                            | Proton Conductivity               |               |            |             | Dielectric Properties |                   | Reference |
|------------------------------------------------------------------------------------------------------------------------------------------------------|-----------------------------------|---------------|------------|-------------|-----------------------|-------------------|-----------|
|                                                                                                                                                      | $\sigma$<br>(S cm <sup>-1</sup> ) | $E_a$<br>(eV) | $T$<br>(K) | $RH$<br>(%) | $\varepsilon'$        | $f$<br>(Hz)       |           |
| Sm-fum-7H <sub>2</sub> O                                                                                                                             | $4.69 \times 10^{-4}$             | 0.12          | 298        | 97          | $2.22 \times 10^3$    | $10^{2.5}$        | This work |
| Er-fum-12H <sub>2</sub> O                                                                                                                            | $5.66 \times 10^{-5}$             | 0.27          | 298        | 97          | $1.42 \times 10^5$    | $10^{2.5}$        | This work |
| [C <sub>4</sub> H <sub>12</sub> N <sub>2</sub> ][Ag <sub>4</sub> (hedp) <sub>2</sub> ] <sup>[a]</sup>                                                | $1.3 \times 10^{-6}$              | 1.23          | 298        | -           | $1.6 \times 10^4$     | $2.5 \times 10^5$ | 58        |
| [C <sub>4</sub> H <sub>12</sub> N <sub>2</sub> ][Ag <sub>10</sub> (hedp) <sub>4</sub> (H <sub>2</sub> O) <sub>2</sub> ] $\cdot 2H_2O$                | $1.4 \times 10^{-5}$              | 1.18          | 298        | -           | $2.1 \times 10^4$     | $2.5 \times 10^2$ | 58        |
| [Ag(C <sub>10</sub> H <sub>8</sub> N <sub>2</sub> )(H <sub>4</sub> hedp)]                                                                            | -                                 | -             | -          | -           | 157                   | $10^3$            | 59        |
| [Ag <sub>2</sub> (C <sub>10</sub> H <sub>8</sub> N <sub>2</sub> )(H <sub>3</sub> hedp)] $\cdot 2H_2O$                                                | -                                 | -             | -          | -           | 191                   | $10^3$            | 59        |
| [C <sub>4</sub> H <sub>12</sub> N <sub>2</sub> ][Ag <sub>4</sub> (H <sub>2</sub> hedp) <sub>2</sub> ]                                                | -                                 | -             | -          | -           | 3408                  | $10^3$            | 59        |
| [C <sub>4</sub> H <sub>12</sub> N <sub>2</sub> ][Ag <sub>10</sub> (H <sub>2</sub> hedp) <sub>4</sub> (H <sub>2</sub> O) <sub>2</sub> ] $\cdot 2H_2O$ | -                                 | -             | -          | -           | 5990                  | $10^3$            | 59        |
| [Ni(Hci) <sub>2</sub> (NH <sub>3</sub> ) <sub>4</sub> ] <sup>[b]</sup>                                                                               | $6.22 \times 10^{-4}$             | 0.252         | 298        | 97          | 26                    | $10^2$            | 60        |
| [Ni(Hci) <sub>2</sub> (H <sub>2</sub> O) <sub>4</sub> ]                                                                                              | $5.44 \times 10^{-5}$             | 0.298         | 298        | 97          | 38                    | $10^2$            | 60        |
| JUC-125 <sup>[c]</sup>                                                                                                                               | $6.3 \times 10^{-5}$              | 0.32          | 298        | 97          | 80                    | $10^2$            | 41        |
| OCC 1 <sup>[d]</sup>                                                                                                                                 | $8.39 \times 10^{-5}$             | 0.41          | 298        | 97          | 156                   | $10^2$            | 43        |
| OCC 2 <sup>[e]</sup>                                                                                                                                 | $2.88 \times 10^{-4}$             | 0.21          | 298        | 97          | 2480                  | $10^2$            | 43        |
| {[Mg(4,4'-bpdc)(H <sub>2</sub> O) <sub>3</sub> ](H <sub>2</sub> O) <sub>n</sub> } <sup>[f]</sup>                                                     | $1.44 \times 10^{-5}$             | 0.277         | 308        | -           | 200                   | 1500              | 61        |
| LiTFTA <sup>[g]</sup>                                                                                                                                | $1.10 \times 10^{-6}$             | 0.56          | 298        | -           | 50                    | -                 | 62        |

Note:  $\sigma$  = proton conductivity (S cm<sup>-1</sup>),  $E_a$  = activation energy (eV),  $T$  = temperature (K),  $RH$  = relative humidity (%),  $\varepsilon'$  = dielectric permittivity,  $f$  = frequency (Hz). <sup>[a]</sup> H<sub>3</sub>hedp = 1-hydroxyethane-1,1-diphosphonic acid. <sup>[b]</sup> H<sub>2</sub>Ci = 1H-indazole-5-carboxylic acid. <sup>[c]</sup> JUC-125 = {[Gd<sub>4</sub>(R-ttpe)<sub>2</sub>(R-Httpe)<sub>2</sub>(HCOO)<sub>2</sub>(H<sub>2</sub>O)<sub>8</sub>] $\cdot 4H_2O$ }<sub>n</sub>, R-H<sub>3</sub>ttpe = (3R, 3'R, 3''R)-1,1',1''-(1,3,5-triazine-2,4,6-triyl)-tripiperidine-3-carboxylic acid. <sup>[d]</sup> OCC 1 = [(H<sub>3</sub>betc)(H-Hopip)<sub>0.5</sub> (H<sub>2</sub>O)], H<sub>4</sub>betc = 1,2,4,5-benzenetetracarboxylic acid, Hopip = homopiperazine. <sup>[e]</sup> OCC 2 = (H<sub>3</sub>betc)<sub>2</sub>(H<sub>2</sub>-Mepip) $\cdot$ (H<sub>2</sub>O), Mepip = 2-methylpiperazine. <sup>[f]</sup> 4,4'-bpdc = 4,4'-biphenyl dicarboxylate. <sup>[g]</sup> LiTFTA = lithium tetrahydrofuran-2,3,4,5-tetracarboxylate.



## XIX. References for electronic supplementary information

- 1 W. H. Zhu, Z. M. Wang and S. Gao, A 3D porous lanthanide–fumarate framework with water hexamer occupied cavities, exhibiting a reversible dehydration and rehydration procedure, *Dalton Trans.*, 2006, **6**, 765–768.
- 2 A. Michaelides, S. Skoulika, E. G. Bakalbassis and J. Mrozinski, Cyclic water hexamers and decamers in a porous lanthanide–organic framework: correlation between some physical properties and crystal structure, *Cryst. Growth Des.*, 2003, **3**, 487–492.
- 3 J. M. Taylor, S. Dekura, R. Ikeda and H. Kitagawa, Defect control to enhance proton conductivity in a metal–organic framework, *Chem. Mater.*, 2015, **27**, 2286–2289.
- 4 H. Wang, T. Wen, Z. Shao, Y. Zhao, Y. Cui, K. Gao, W. Xu and H. Hou, High proton conductivity in Nafion/Ni–MOF composite membranes promoted by ligand exchange under ambient conditions, *Inorg. Chem.*, 2021, **60**, 10492–10501.
- 5 Y.-W. Bai, G. Shi, J. Gao and F. N. Shi, MOF decomposed for the preparation of Co<sub>3</sub>O<sub>4</sub>/N–doped carbon with excellent microwave absorption, *J. Solid State Chem.*, 2020, **288**, 121401.
- 6 X. Fan, A. Zhang, M. Li, H. Xu, J. Xue, F. Ye and L. Cheng, A reduced graphene oxide/bi–MOF–derived carbon composite as high–performance microwave absorber with tunable dielectric properties, *J. Mater. Sci.: Mater. Electron.*, 2020, **31**, 11774–11783.
- 7 X. Xie, Z. Zhang, J. Zhang, L. Hou, Z. Li and G. Li, Impressive proton conductivities of two highly stable metal–organic frameworks constructed by substituted imidazolecarboxylates, *Inorg. Chem.*, 2019, **58**, 5173–5182.
- 8 Y. Tian, G. Liang, T. Fan, J. Shang, S. Shang, Y. Ma, R. Matsuda, M. Liu, M. Wang, L. Li and S. Kitagawa, Grafting free carboxylic acid groups onto the pore surface of 3D porous coordination polymers for high proton conductivity, *Chem. Mater.*, 2019, **31**, 8494–8503.
- 9 J. Wang, Y. Li, M. Jiang, Y. Liu, L. Zhang and P. Wu, A highly chemically stable metal–organic framework as a luminescent probe for the regenerable ratiometric sensing of pH, *Chem. Eur. J.*, 2016, **22**, 13023–13027.
- 10 F. F. Li, W. R. Cui, W. Jiang, C. R. Zhang, R. P. Liang and J. D. Qiu, Stable sp carbon-conjugated covalent organic framework for detection and efficient adsorption of uranium from radioactive wastewater, *J. Hazard. Mater.*, 2020, **392**, 122333.
- 11 Y. Chen, B. Wang, X. Wang, L. H. Xie, J. Li, Y. Xie and J. R. Li, A copper(II)-paddlewheel metal–organic framework with exceptional hydrolytic stability and selective adsorption and detection ability of aniline in water, *ACS Appl. Mater. Interfaces*, 2017, **9**, 27027–27035.
- 12 S. Rodríguez-Hermida, M. Y. Tsang, C. Vignatti, K. C. Stylianou, V. Guillerm, J. Pérez-Carvajal, F. Teixidor, C. Viñas, D. Choquesillo-Lazarte, C. Verdugo-Escamilla, I. Peral, J. Juanhuix, A. Verdager, I. Imaz, D. Maspoch and J. Giner Planas, Switchable surface hydrophobicity–hydrophilicity of a metal–

- organic framework, *Angew. Chem. Int. Ed.*, 2016, **55**, 16049–16053.
- 13 K. Wang, D. Feng, T. F. Liu, J. Su, S. Yuan, Y. P. Chen, M. Bosch, X. Zou and H. C. Zhou, A series of highly stable mesoporous metalloporphyrin Fe-MOFs, *J. Am. Chem. Soc.*, 2014, **136**, 13983–13986.
  - 14 D. Feng, K. Wang, Z. Wei, Y. P. Chen, C. M. Simon, R. K. Arvapally, R. L. Martin, M. Bosch, T. F. Liu, S. Fordham, D. Yuan, M. A. Omary, M. Haranczyk, B. Smit and H. C. Zhou, Kinetically tuned dimensional augmentation as a versatile synthetic route towards robust metal–organic frameworks, *Nat. Commun.*, 2014, **5**, 5723.
  - 15 D. Feng, K. Wang, J. Su, T. F. Liu, J. Park, Z. Wei, M. Bosch, A. Yakovenko, X. Zou and H. C. Zhou, A highly stable zeotype mesoporous zirconium metal–organic framework with ultralarge pores, *Angew. Chem. Int. Ed.*, 2014, **54**, 149–154.
  - 16 Y. J. Yang, Y. H. Li, D. Liu and G. H. Cui, A dual-responsive luminescent sensor based on a water-stable Cd(ii)-MOF for the highly selective and sensitive detection of acetylacetone and  $\text{Cr}_2\text{O}_7^{2-}$  in aqueous solutions, *CrystEngComm*, 2020, **22**, 1166–1175.
  - 17 Y. Yang, L. Chen, F. Jiang, M. Wu, J. Pang, X. Wan and M. Hong, A water-stable 3D Eu-MOF based on a metallacyclodimeric secondary building unit for sensitive fluorescent detection of acetone molecules, *CrystEngComm*, 2019, **21**, 321–328.
  - 18 W. J. Phang, W. R. Lee, K. Yoo, D. W. Ryu, B. Kim and C. S. Hong, pH-dependent proton conducting behavior in a metal–organic framework material, *Angew. Chem.*, 2014, **126**, 8523–8527.
  - 19 X. Liang, S. Wang, S. Zhang, C. Lin, F. Xie, R. Li, F. Zhang, C. Wen, L. Feng and C. Wan, High proton conductivity modulated by active protons in 1D ultra-stable metal–organic coordination polymers: a new insight into the coordination interaction/ability of metal ions, *Inorg. Chem. Front.*, 2023, **10**, 1238–1254.
  - 20 S. Wang, F. Xie, S. Zhang, X. Liang, Q. Gao, Y. Chen, F. Zhang, C. Wen, L. Feng and C. Wan, Water-assisted proton conduction regulated by hydrophilic groups in metallo-hydrogen-bonded organic frameworks: “like-attracts-like” between hydrophilic groups and water molecules, *CrystEngComm*, 2023, **25**, 4701–4715.
  - 21 F. Costantino, A. Donnadio and M. Casciola, Survey on the phase transitions and their effect on the ion-exchange and on the proton-conduction properties of a flexible and robust Zr phosphonate coordination polymer, *Inorg. Chem.*, 2012, **51**, 6992–7000.
  - 22 S. Biswas, J. Chakraborty, V. Singh Parmar, S. P. Bera, N. Ganguli and S. Konar, Channel-assisted proton conduction behavior in hydroxyl-rich Lanthanide-based magnetic metal–organic frameworks, *Inorg. Chem.*, 2017, **56**, 4956–4965.
  - 23 X. Meng, H. N. Wang, L. S. Wang, Y. H. Zou and Z. Y. Zhou, Enhanced proton conductivity of a MOF-808 framework through anchoring organic acids to the zirconium clusters by post-synthetic modification, *CrystEngComm*, 2019, **21**, 3146–3150.
  - 24 X. Y. Dong, X. P. Hu, H. C. Yao, S. Q. Zang, H. W. Hou and T. C. W. Mak, Alkaline earth metal (Mg, Sr, Ba)–organic frameworks based on 2,2',6,6'-tetracarboxybiphenyl for proton conduction, *Inorg. Chem.*, 2014, **53**, 12050–

12057.

- 25 F. M. Zhang, L. Z. Dong, J. S. Qin, W. Guan, J. Liu, S. L. Li, M. Lu, Y. Q. Lan, Z. M. Su and H. C. Zhou, Effect of imidazole arrangements on proton-conductivity in metal–organic frameworks, *J. Am. Chem. Soc.*, 2017, **139**, 6183–6189.
- 26 W. Chen, C. Yang, S. Yu, Z. Li and G. Li, Proton conduction and impedance sensing of a highly stable copper–organic framework from imidazole dicarboxylate, *Polyhedron*, 2019, **158**, 377–385.
- 27 X. Xie, Z. Zhang, J. Zhang, L. Hou, Z. Li and G. Li, Impressive proton conductivities of two highly stable metal–organic frameworks constructed by substituted imidazoledicarboxylates, *Inorg. Chem.*, 2019, **58**, 5173–5182.
- 28 M. Wei, X. Wang and X. Duan, Crystal structures and proton conductivities of a MOF and two POM–MOF composites based on Cu<sup>II</sup> ions and 2,2'-bipyridyl-3,3'-dicarboxylic acid, *Chem. Eur. J.*, 2012, **19**, 1607–1616.
- 29 S. K. Konavarapu, A. Goswami, A. G. Kumar, S. Banerjee and K. Biradha, MOFs containing a linear bis-pyridyl-tris-amide and angular carboxylates: exploration of proton conductivity, water vapor and dye sorptions, *Inorg. Chem. Front.*, 2019, **6**, 184–191.
- 30 R. Liu, L. Zhao, S. Yu, X. Liang, Z. Li and G. Li, Enhancing proton conductivity of a 3D metal–organic framework by attaching guest NH<sub>3</sub> molecules, *Inorg. Chem.*, 2018, **57**, 11560–11568.
- 31 X. M. Li, J. Liu, C. Zhao, J. L. Zhou, L. Zhao, S. L. Li and Y. Q. Lan, Strategic hierarchical improvement of superprotonic conductivity in a stable metal–organic framework system, *J. Mater. Chem. A*, 2019, **7**, 25165–25171.
- 32 X. Liang, B. Li, M. Wang, J. Wang, R. Liu and G. Li, Effective approach to promoting the proton conductivity of metal–organic frameworks by exposure to aqua–ammonia vapor, *ACS Appl. Mater. Interfaces*, 2017, **9**, 25082–25086.
- 33 W. Chen, L. Zhao, S. Yu, Z. Li, J. Feng and G. Li, Two water-stable 3D supramolecules supported by hydrogen bonds for proton conduction, *Polyhedron*, 2018, **148**, 100–108.
- 34 Y. Y. Yuan, S. L. Yang, C. X. Zhang and Q. L. Wang, A new europium metal–organic framework with both high proton conductivity and highly sensitive detection of ascorbic acid, *CrystEngComm*, 2018, **20**, 6989–6994.
- 35 M. Y. Xu, Y. L. Wang, Q. Liu, Z. T. Lin and Q. Y. Liu, Lanthanide 5,7-disulfonate-1,4-naphthalenedicarboxylate frameworks constructed from trinuclear and tetranuclear Lanthanide carboxylate clusters: proton conduction and selective fluorescent sensing of Fe<sup>3+</sup>, *Inorg. Chem.*, 2020, **59**, 7265–7273.
- 36 X. Y. Dong, R. Wang, J. Z. Wang, S. Q. Zang and T. C. W. Mak, Highly selective Fe<sup>3+</sup> sensing and proton conduction in a water-stable sulfonate–carboxylate Tb–organic-framework, *J. Mater. Chem. A*, 2015, **3**, 641–647.
- 37 M. J. Wei, J. Q. Fu, Y. D. Wang, Y. Zhang, H. Y. Zang, K. Z. Shao, Y. G. Li and Z. M. Su, Highly tuneable proton-conducting coordination polymers derived from a sulfonate-based ligand, *CrystEngComm*, 2017, **19**, 7050–7056.
- 38 J. Lee, D. W. Lim, S. Dekura, H. Kitagawa and W. Choe, MOP × MOF: collaborative combination of metal–organic polyhedra and metal–organic

- framework for proton conductivity, *ACS Appl. Mater. Interfaces*, 2019, **11**, 12639–12646.
- 39 X. Liang, and Z. Fan, Structural characterization and proton-conductive property of a lanthanide metal-organic framework assembled from 1, 2, 4, 5-benzenetetracarboxylic acid and piperazine, *Chin. J. Struct. Chem.*, 2017, **36**, 977–984.
  - 40 X. Liang, T. Cao, L. Wang, C. Zheng, Y. Zhao, F. Zhang, C. Wen, L. Feng and C. Wan, From an organic ligand to a metal–organic coordination polymer, and to a metal–organic coordination polymer–cocrystal composite: a continuous promotion of the proton conductivity of crystalline materials, *CrystEngComm*, 2020, **22**, 1414–1424.
  - 41 X. Liang, F. Zhang, H. Zhao, W. Ye, L. Long and G. Zhu, A proton-conducting lanthanide metal–organic framework integrated with a dielectric anomaly and second-order nonlinear optical effect, *Chem. Commun.*, 2014, **50**, 6513–6516.
  - 42 X. Liang, R. Li and Z. Fan, Hydrothermal synthesis, crystal structure and proton conductivity of a Pr–Ca heterometal-organic framework generated by 1, 2, 4, 5-benzenetetracarboxylic acid, *Chin. J. Struct. Chem.*, 2017, **36**, 993–1002.
  - 43 X. Liang, Y. Chen, L. Wang, F. Zhang, Z. Fan, T. Cao, Y. Cao, H. Zhu, X. He, B. Deng, Y. You, Y. Dong and Y. Zhao, Effect of carbon-skeleton isomerism on the dielectric properties and proton conduction of organic cocrystal compounds assembled from 1,2,4,5-benzenetetracarboxylic acid and piperazine derivatives, *New J. Chem.*, 2019, **43**, 11099–11112.
  - 44 X. Liang, K. Cai, F. Zhang, J. Liu and G. Zhu, A proton-conductive lanthanide oxalatophosphonate framework featuring unique chemical stability: stabilities of bulk phase and surface structure, *J. Mater. Chem. A*, 2017, **5**, 25350–25358.
  - 45 X. Liang, K. Cai, F. Zhang, J. Liu and G. Zhu, One, two, and three-dimensional metal–organic coordination polymers derived from enantiopure organic phosphate: homochirality, water stability and proton conduction, *CrystEngComm*, 2017, **19**, 6325–6332.
  - 46 B. Huang, S. Zhang, C. Wan, X. Liang, F. Zhang, L. Feng and C. Wen, Combined Effect of Hydrophilic Pore and the Type of Protons on Proton Conductivity in Porous Metal–Organic Frameworks: A Feasible Approach to Achieve a Super Proton Conductor under Hydrated Conditions, *Inorganic Chemistry*, 2024, **63**, 16688–16701.
  - 47 D. W. Fu, H. Y. Ye, Q. Ye, K. J. Pan and R. G. Xiong, Ferroelectric metal–organic coordination polymer with a high dielectric constant, *Dalton Trans.*, 2008, **7**, 874–877.
  - 48 A. Pathak, G. R. Chiou, N. R. Gade, M. Usman, S. Mendiratta, T. T. Luo, T. W. Tseng, J. W. Chen, F. R. Chen and K. H. Chen, High- $\kappa$  samarium-based metal–organic framework for gate dielectric applications, *ACS Appl. Mater. Interfaces*, 2017, **9**, 21872–21878.
  - 49 M. Guo, H. L. Cai and R. G. Xiong, Ferroelectric metal organic framework (MOF), *Inorg. Chem. Commun.*, 2010, **13**, 1590–1598.
  - 50 M. Sánchez-Andújar, S. Yáñez-Vilar, B. Pato-Doldán, C. Gómez-Aguirre, S.

- Castro-García and M. A. Señarís-Rodríguez, Apparent colossal dielectric constants in nanoporous metal organic frameworks, *J. Phys. Chem. C*, 2012, **116**, 13026–13032.
- 51 S. Kamal, K. R. Chiou, B. Sainbileg, A. I. Inamdar, M. Usman, A. Pathak, T. T. Luo, J. W. Chen, M. Hayashi, C. H. Hung and K. L. Lu, Thermally stable indium based metal–organic frameworks with high dielectric permittivity, *J. Mater. Chem. C*, 2020, **8**, 9724–9733.
- 52 X. Peng, W. Xu, L. Chen, Y. Ding, S. Chen, X. Wang and H. Hou, Polyimide complexes with high dielectric performance: toward polymer film capacitor applications, *J. Mater. Chem. C*, 2016, **4**, 6452–6456.
- 53 W. J. Ji, Q. G. Zhai, S. N. Li, Y. C. Jiang and M. C. Hu, The first ionothermal synthesis of a 3D ferroelectric metal–organic framework with colossal dielectric constant, *Chem. Commun.*, 2011, **47**, 3834–3836.
- 54 C. C. Homes, T. Vogt, S. M. Shapiro, S. Wakimoto and A. P. Ramirez, Optical response of high-dielectric-constant perovskite-related oxide, *Science*, 2001, **293**, 673–676.
- 55 Q. Ye, Y. M. Song, G. X. Wang, K. Chen, D. W. Fu, P. W. Hong Chan, J. S. Zhu, S. D. Huang and R. G. Xiong, Ferroelectric metal–organic framework with a high dielectric constant, *J. Am. Chem. Soc.*, 2006, **128**, 6554–6555.
- 56 H. He, Y. Cui, B. Li, B. Wang, C. Jin, J. Yu, L. Yao, Y. Yang, B. Chen and G. Qian, Confinement of perovskite-QDs within a single MOF crystal for significantly enhanced multiphoton excited luminescence, *Adv. Mater.*, 2018, **31**, 1806897.
- 57 S. Laha, A. Chakraborty and T. K. Maji, Synergistic role of microwave and perturbation toward synthesis of hierarchical porous MOFs with tunable porosity, *Inorg. Chem.*, 2020, **59**, 3775–3782.
- 58 T. Rom, N. Kumar, M. Sharma, A. Gaur and A. K. Paul, Colossal dielectric responses from the wide band gap 2D-semiconducting amine templated hybrid framework materials, *Inorg. Chem.*, 2020, **59**, 9465–9470.
- 59 T. Rom and A. K. Paul, Role of aromatic vs. aliphatic amine for the variation of structural, electrical and catalytic behaviors in a series of silver phosphonate extended hybrid solids, *Dalton Trans.*, 2020, **49**, 13618–13634.
- 60 S. Feng, F. Xie, C. Wan, F. Zhang, L. Feng, C. Wen and X. Liang, Impact of the number of hydrogen bonds on proton conductivity in metallo–hydrogen–bonded organic frameworks: the more the number of hydrogen bonds, the better the proton conductivity at the maximum relative humidity, *CrystEngComm*, 2024, **26**, 4855–4870.
- 61 S. Singha, S. K. Maity, S. Biswas, R. Saha and S. Kumar, A magnesium-based bifunctional MOF: studies on proton conductivity, gas and water adsorption, *Inorg. Chim. Acta*, 2016, **453**, 321–329.
- 62 V. Zima, K. Shimakawa and C. H. Lin, Protonic conductivity of polycrystalline materials evaluated with effective medium percolation approach: A case study on lithium-carboxylate based MOF, *Solid State Ionics*, 2016, **292**, 98–102.
